# Supplementary material for: Full-dimensional quantum mechanical calculations for the tunneling behavior of HOCO dissociation to H + CO2
Source: Royal Society of Chemistry journal article supplement (doi:10.1039/d1cp04269f), 2022-01-01
Supplement: d1cp04269f1.pdf [file d1cp04269f1.pdf]

# Supplementary Materials for

## Full-dimensional quantum mechanics calculations for the tunneling behavior of HOCO dissociation to H+CO<sub>2</sub>

Dandan Ma, Jianyi Ma\*

Institute of Atomic and Molecular Physics, Sichuan University, Chengdu, Sichuan  
610065, China.

**Table S1.** Energy and lifetimes of lifetime-convergent vibrational states of the HOCO system

**Table S2.** Energy and lifetimes of lifetime-convergent vibrational states of the HOCO system in the energy region of 6400-6500 cm<sup>-1</sup> (arranged by the lifetimes)

## Supplementary Materials

A total of 1500 states were obtained by current quantum calculation. The lifetimes of these resonances were calculated based on the estimated widths obtained using the filter diagonalization method after the Chebyshev propagator. Statistically, lifetimes for 1237 states were obtained altogether in the present work. The energy and lifetimes of these states are listed in Table S1. These resonances were assigned based on exact eigenvalues and wavefunctions. It should be noted that some high-energy states cannot be assigned because of the complex coupling and delocalization of wavefunctions.

**Table S1.** Energy and lifetimes of lifetime-convergent vibrational states of the HOCO system

| Energy    | Lifetime | <i>trans</i>                                 | <i>cis</i>                                   | Energy    | Lifetime | <i>trans</i>                                 | <i>cis</i>                                                  |
|-----------|----------|----------------------------------------------|----------------------------------------------|-----------|----------|----------------------------------------------|-------------------------------------------------------------|
| 1122.111  | 4.16E-03 |                                              | 5 <sup>1</sup>                               | 4139.8733 | 4.71E-03 |                                              |                                                             |
| 1582.916  | 4.77E-03 |                                              | 6 <sup>2</sup>                               | 4165.0888 | 2.84E-03 |                                              | 2 <sup>2</sup>                                              |
| 1861.931  | 4.88E-03 |                                              |                                              | 4184.4556 | 2.42E-03 |                                              | 5 <sup>4</sup> 3 <sup>1</sup>                               |
| 2154.512  | 3.27E-03 |                                              | 5 <sup>1</sup> 4 <sup>1</sup>                | 4283.2289 | 2.67E-03 | 6 <sup>4</sup> 5 <sup>1</sup> 2 <sup>1</sup> |                                                             |
| 2452.498  | 4.61E-03 | 5 <sup>4</sup>                               |                                              | 4304.9306 | 3.25E-03 |                                              |                                                             |
| 2458.2911 | 5.20E-03 | 5 <sup>1</sup> 2 <sup>1</sup>                |                                              | 4305.8079 | 2.91E-03 |                                              |                                                             |
| 2765.3271 | 3.23E-03 |                                              | 6 <sup>2</sup> 5 <sup>2</sup>                | 4339.2042 | 2.81E-04 |                                              | 5 <sup>3</sup> 4 <sup>2</sup>                               |
| 2817.4391 | 4.67E-03 |                                              | 4 <sup>1</sup> 3 <sup>1</sup>                | 4357.9422 | 1.80E-03 |                                              |                                                             |
| 3108.1461 | 4.89E-03 | 6 <sup>4</sup> 5 <sup>2</sup>                |                                              | 4370.3341 | 2.68E-03 |                                              |                                                             |
| 3389.6047 | 5.15E-03 |                                              | 6 <sup>2</sup> 2 <sup>1</sup>                | 4371.4064 | 4.28E-03 | 6 <sup>2</sup> 4 <sup>1</sup> 3 <sup>2</sup> |                                                             |
| 3438.0099 | 4.95E-03 |                                              |                                              | 4384.3796 | 4.23E-03 |                                              | 6 <sup>2</sup> 5 <sup>1</sup> 4 <sup>1</sup> 3 <sup>1</sup> |
| 3463.7175 | 5.22E-03 |                                              | 6 <sup>4</sup> 4 <sup>1</sup>                | 4391.9795 | 2.62E-03 |                                              |                                                             |
| 3653.0671 | 4.72E-03 | 5 <sup>1</sup> 3 <sup>1</sup> 2 <sup>1</sup> |                                              | 4398.7892 | 1.79E-03 |                                              |                                                             |
| 3662.1    | 2.97E-03 | 6 <sup>4</sup> 5 <sup>1</sup> 3 <sup>1</sup> |                                              | 4407.2074 | 2.16E-03 |                                              | 5 <sup>1</sup> 4 <sup>2</sup> 3 <sup>1</sup>                |
| 3753.9112 | 3.06E-03 |                                              | 5 <sup>2</sup> 4 <sup>2</sup>                | 4452.9171 | 4.23E-03 |                                              |                                                             |
| 3778.4923 | 5.83E-03 | 6 <sup>6</sup> 3 <sup>2</sup>                |                                              | 4468.4465 | 4.34E-03 | 5 <sup>1</sup> 4 <sup>2</sup> 2 <sup>1</sup> |                                                             |
| 3857.5671 | 4.36E-03 | 6 <sup>6</sup> 5 <sup>2</sup>                |                                              | 4524.1453 | 1.36E-04 |                                              | 5 <sup>5</sup> 4 <sup>1</sup>                               |
| 3877.5943 | 3.44E-03 | 4 <sup>2</sup> 2 <sup>1</sup>                |                                              | 4529.3689 | 2.63E-04 |                                              | 5 <sup>2</sup> 4 <sup>1</sup> 2 <sup>1</sup>                |
| 3928.617  | 2.85E-03 |                                              | 5 <sup>4</sup> 4 <sup>1</sup>                | 4537.9986 | 1.39E-05 |                                              | 6 <sup>2</sup> 5 <sup>5</sup>                               |
| 3965.8913 | 3.24E-03 |                                              | 1 <sup>1</sup>                               | 4555.3735 | 9.21E-04 |                                              | 5 <sup>1</sup> 1 <sup>1</sup>                               |
| 3969.9056 | 5.06E-03 |                                              |                                              | 4556.4938 | 2.00E-03 |                                              | 6 <sup>2</sup> 4 <sup>3</sup>                               |
| 3997.3308 | 3.39E-03 |                                              | 5 <sup>2</sup> 4 <sup>1</sup> 3 <sup>1</sup> | 4563.0808 | 3.72E-03 |                                              |                                                             |
| 4024.1228 | 5.26E-03 | 6 <sup>2</sup> 5 <sup>3</sup> 3 <sup>1</sup> |                                              | 4580.8031 | 2.60E-03 |                                              |                                                             |
| 4077.694  | 3.00E-03 | 4 <sup>1</sup> 3 <sup>1</sup> 2 <sup>1</sup> |                                              | 4588.6637 | 5.26E-04 |                                              | 5 <sup>3</sup> 4 <sup>1</sup> 3 <sup>1</sup>                |
| 4082.1207 | 2.89E-03 |                                              | 6 <sup>2</sup> 3 <sup>2</sup>                | 4594.5903 | 9.44E-04 | 6 <sup>2</sup> 1 <sup>1</sup>                |                                                             |
| 4117.5173 | 1.09E-03 |                                              | 5 <sup>6</sup>                               | 4605.8084 | 2.28E-03 |                                              |                                                             |

| Energy    | Lifetime | <i>trans</i>                                                | <i>cis</i>                                                  | Energy    | Lifetime | <i>trans</i>                                 | <i>cis</i>                                   |
|-----------|----------|-------------------------------------------------------------|-------------------------------------------------------------|-----------|----------|----------------------------------------------|----------------------------------------------|
| 4609.6447 | 2.79E-03 |                                                             | 4 <sup>4</sup>                                              | 5050.788  | 3.42E-03 |                                              |                                              |
| 4628.2467 | 2.66E-03 |                                                             |                                                             | 5051.649  | 4.20E-03 |                                              |                                              |
| 4632.174  | 3.52E-03 |                                                             | 6 <sup>2</sup> 5 <sup>1</sup> 3 <sup>2</sup>                | 5060.122  | 5.27E-03 |                                              |                                              |
| 4643.818  | 1.99E-03 |                                                             | 6 <sup>0</sup> 5 <sup>1</sup> 4 <sup>1</sup> 3 <sup>2</sup> | 5093.238  | 3.76E-03 | 6 <sup>4</sup> 5 <sup>2</sup> 4 <sup>1</sup> |                                              |
| 4663.455  | 4.62E-03 | 6 <sup>2</sup> 2 <sup>2</sup>                               |                                                             | 5096.159  | 3.59E-03 |                                              |                                              |
| 4668.735  | 2.30E-03 |                                                             |                                                             | 5114.764  | 7.44E-05 | 6 <sup>2</sup> 5 <sup>1</sup> 3 <sup>3</sup> |                                              |
| 4676.117  | 4.87E-03 | 5 <sup>6</sup> 4 <sup>1</sup>                               |                                                             | 5115.304  | 8.79E-05 |                                              |                                              |
| 4701.249  | 8.68E-04 |                                                             |                                                             | 5120.872  | 1.29E-03 |                                              |                                              |
| 4705.197  | 3.23E-03 | 6 <sup>2</sup> 5 <sup>6</sup>                               |                                                             | 5128.573  | 1.24E-05 |                                              | 5 <sup>6</sup> 4 <sup>1</sup>                |
| 4720.898  | 5.46E-04 | 6 <sup>4</sup> 5 <sup>3</sup> 4 <sup>1</sup>                |                                                             | 5134.298  | 6.10E-05 |                                              | 5 <sup>3</sup> 2 <sup>1</sup>                |
| 4722.583  | 1.68E-04 |                                                             | 5 <sup>7</sup>                                              | 5137.256  | 1.33E-04 |                                              |                                              |
| 4739.828  | 2.72E-03 |                                                             |                                                             | 5146.453  | 2.57E-05 |                                              | 5 <sup>2</sup> 1 <sup>1</sup>                |
| 4742.384  | 3.14E-04 |                                                             |                                                             | 5147.147  | 1.83E-03 |                                              | 6 <sup>2</sup> 2 <sup>2</sup>                |
| 4746.213  | 1.75E-04 |                                                             | 5 <sup>2</sup> 4 <sup>3</sup>                               | 5155.857  | 6.58E-05 |                                              | 4 <sup>1</sup> 2 <sup>2</sup>                |
| 4750.656  | 1.09E-03 |                                                             |                                                             | 5159.1182 | 7.23E-04 |                                              | 6 <sup>2</sup> 5 <sup>6</sup>                |
| 4753.886  | 2.99E-04 |                                                             |                                                             | 5162.5746 | 5.89E-04 |                                              |                                              |
| 4765.822  | 1.06E-03 |                                                             | 5 <sup>2</sup> 4 <sup>2</sup>                               | 5164.7738 | 3.38E-03 | 5 <sup>1</sup> 4 <sup>1</sup> 3 <sup>3</sup> |                                              |
| 4780.872  | 1.81E-03 |                                                             |                                                             | 5170.3826 | 1.40E-04 |                                              |                                              |
| 4784.333  | 2.10E-04 |                                                             | 5 <sup>5</sup> 3 <sup>1</sup>                               | 5171.6121 | 8.73E-04 |                                              |                                              |
| 4790.177  | 2.90E-03 |                                                             |                                                             | 5172.5914 | 1.67E-04 |                                              |                                              |
| 4793.525  | 5.55E-04 |                                                             | 5 <sup>2</sup> 3 <sup>1</sup> 2 <sup>1</sup>                | 5181.467  | 5.40E-05 |                                              |                                              |
| 4810.497  | 1.01E-03 |                                                             | 4 <sup>3</sup> 3 <sup>1</sup>                               | 5182.2806 | 5.98E-04 |                                              |                                              |
| 4846.583  | 7.33E-04 |                                                             | 5 <sup>3</sup> 3 <sup>2</sup>                               | 5183.7432 | 2.18E-05 |                                              | 5 <sup>4</sup> 4 <sup>1</sup> 3 <sup>1</sup> |
| 4863.245  | 4.93E-03 |                                                             |                                                             | 5195.0962 | 2.40E-04 |                                              |                                              |
| 4898.49   | 3.50E-03 |                                                             |                                                             | 5200.0442 | 5.72E-04 | 6 <sup>4</sup> 4 <sup>1</sup> 3 <sup>2</sup> |                                              |
| 4927.462  | 1.62E-05 |                                                             | 5 <sup>4</sup> 4 <sup>2</sup>                               | 5200.6299 | 3.94E-04 |                                              |                                              |
| 4936.969  | 5.60E-04 |                                                             |                                                             | 5205.2999 | 1.18E-03 |                                              |                                              |
| 4945.095  | 9.74E-05 |                                                             | 6 <sup>2</sup> 5 <sup>4</sup> 4 <sup>1</sup>                | 5206.5671 | 8.43E-04 |                                              | 6 <sup>2</sup> 5 <sup>4</sup> 3 <sup>1</sup> |
| 4948.086  | 2.06E-03 |                                                             |                                                             | 5209.0315 | 2.56E-04 |                                              | 6 <sup>1</sup> 3 <sup>1</sup> 1 <sup>1</sup> |
| 4960.464  | 3.39E-04 |                                                             |                                                             | 5211.1119 | 9.70E-04 |                                              |                                              |
| 4970.136  | 4.84E-03 |                                                             |                                                             | 5217.273  | 3.78E-03 | 6 <sup>2</sup> 5 <sup>3</sup> 3 <sup>2</sup> |                                              |
| 4974.551  | 4.47E-03 | 6 <sup>2</sup> 5 <sup>1</sup> 4 <sup>1</sup> 3 <sup>2</sup> |                                                             | 5220.473  | 1.82E-03 |                                              |                                              |
| 4987.388  | 7.65E-05 |                                                             | 5 <sup>2</sup> 4 <sup>2</sup> 3 <sup>1</sup>                | 5235.1615 | 1.55E-04 |                                              | 5 <sup>2</sup> 4 <sup>1</sup> 3 <sup>2</sup> |
| 4991.213  | 1.35E-03 | 6 <sup>6</sup> 5 <sup>2</sup> 3 <sup>1</sup>                |                                                             | 5240.4958 | 2.01E-03 |                                              |                                              |
| 4999.429  | 3.83E-04 |                                                             | 4 <sup>1</sup> 1 <sup>1</sup>                               | 5254.6052 | 5.16E-03 |                                              |                                              |
| 5001.961  | 1.33E-04 |                                                             | 6 <sup>2</sup> 5 <sup>2</sup> 4 <sup>1</sup> 3 <sup>1</sup> | 5259.7179 | 1.29E-03 |                                              |                                              |
| 5008.376  | 4.78E-03 |                                                             |                                                             | 5269.4644 | 5.63E-03 | 4 <sup>4</sup> 3 <sup>1</sup>                |                                              |
| 5029.276  | 3.22E-03 | 6 <sup>2</sup> 4 <sup>4</sup>                               |                                                             | 5270.6518 | 2.13E-03 |                                              | 4 <sup>1</sup> 3 <sup>3</sup>                |
| 5032.376  | 2.50E-03 |                                                             |                                                             | 5271.9498 | 1.78E-03 |                                              |                                              |
| 5033.261  | 4.97E-03 |                                                             |                                                             | 5280.6405 | 2.84E-03 |                                              |                                              |
| 5037.227  | 5.89E-04 |                                                             | 4 <sup>2</sup> 3 <sup>2</sup>                               | 5291.7104 | 2.29E-03 |                                              |                                              |
| 5044.555  | 2.74E-03 |                                                             |                                                             | 5294.1604 | 4.01E-03 |                                              |                                              |

| Energy    | Lifetime | <i>trans</i>                                    | <i>cis</i>                                     | Energy    | Lifetime | <i>trans</i>                                    | <i>cis</i>                                      |
|-----------|----------|-------------------------------------------------|------------------------------------------------|-----------|----------|-------------------------------------------------|-------------------------------------------------|
| 5300.1184 | 1.38E-04 |                                                 |                                                | 5494.348  | 2.02E-04 |                                                 |                                                 |
| 5300.3252 | 1.53E-04 |                                                 |                                                | 5501.268  | 8.30E-04 | 6 <sup>05</sup> 14 <sup>3</sup> 2 <sup>1</sup>  |                                                 |
| 5311.5043 | 3.27E-03 | 6 <sup>44</sup> 13 <sup>2</sup>                 |                                                | 5502.579  | 3.92E-04 |                                                 |                                                 |
| 5315.7628 | 3.00E-03 | 6 <sup>43</sup> 3                               |                                                | 5505.902  | 3.92E-04 |                                                 |                                                 |
| 5323.8488 | 1.64E-05 |                                                 | 5 <sup>8</sup>                                 | 5508.507  | 3.30E-04 |                                                 |                                                 |
| 5326.8496 | 8.52E-06 |                                                 | 6 <sup>24</sup> 2 <sup>2</sup> 1               | 5509.108  | 6.70E-04 |                                                 |                                                 |
| 5327.9539 | 8.23E-06 |                                                 | 6 <sup>25</sup> 3 <sup>4</sup> 2               | 5510.856  | 2.09E-03 | 6 <sup>64</sup> 13 <sup>3</sup>                 |                                                 |
| 5330.9331 | 2.69E-05 | 6 <sup>45</sup> 4 <sup>4</sup> 1                |                                                | 5520.099  | 1.09E-06 |                                                 | 6 <sup>05</sup> 5 <sup>4</sup> 2                |
| 5335.2656 | 4.29E-04 |                                                 |                                                | 5522.316  | 7.05E-05 |                                                 |                                                 |
| 5337.5089 | 3.89E-05 |                                                 | 6 <sup>25</sup> 14 <sup>3</sup>                | 5524.291  | 8.57E-06 |                                                 |                                                 |
| 5339.9332 | 1.37E-04 |                                                 | 6 <sup>23</sup> 3                              | 5526.231  | 1.64E-04 | 6 <sup>45</sup> 4 <sup>3</sup> 1                |                                                 |
| 5350.6335 | 2.02E-04 |                                                 | 6 <sup>45</sup> 14 <sup>1</sup> 3 <sup>1</sup> | 5531.239  | 1.83E-04 | 6 <sup>05</sup> 9                               |                                                 |
| 5355.0534 | 1.06E-04 |                                                 | 6 <sup>45</sup> 2 <sup>3</sup> 2               | 5532.077  | 1.27E-03 | 6 <sup>42</sup> 2                               |                                                 |
| 5361.0477 | 1.25E-04 |                                                 | 6 <sup>04</sup> 3 <sup>2</sup> 1               | 5534.385  | 1.26E-03 |                                                 | 6 <sup>03</sup> 4 <sup>4</sup>                  |
| 5365.636  | 7.65E-04 |                                                 |                                                | 5537.911  | 2.49E-04 |                                                 |                                                 |
| 5368.2862 | 1.55E-03 | 6 <sup>45</sup> 2 <sup>3</sup> 2                |                                                | 5549.648  | 1.96E-04 |                                                 | 6 <sup>24</sup> 4 <sup>4</sup>                  |
| 5369.7092 | 2.84E-04 |                                                 |                                                | 5552.022  | 5.35E-04 | 6 <sup>45</sup> 14 <sup>3</sup>                 |                                                 |
| 5375.7426 | 1.13E-04 |                                                 | 5 <sup>14</sup> 3 <sup>3</sup> 1               | 5552.976  | 3.24E-05 |                                                 |                                                 |
| 5381.5082 | 9.04E-05 |                                                 | 5 <sup>43</sup> 2                              | 5565.595  | 4.90E-05 | 6 <sup>65</sup> 1                               |                                                 |
| 5384.3347 | 7.74E-05 |                                                 |                                                | 5568.769  | 1.52E-03 |                                                 | 6 <sup>45</sup> 3 <sup>3</sup> 1                |
| 5391.5181 | 8.93E-06 |                                                 | 6 <sup>25</sup> 3 <sup>4</sup> 2               | 5569.421  | 2.15E-03 | 6 <sup>24</sup> 2 <sup>3</sup> 3                |                                                 |
| 5395.7166 | 1.39E-04 | 6 <sup>25</sup> 2 <sup>4</sup> 2 <sup>3</sup> 1 |                                                | 5572.037  | 1.32E-04 | 6 <sup>64</sup> 3                               |                                                 |
| 5396.6386 | 4.50E-05 |                                                 | 5 <sup>63</sup> 1                              | 5574.399  | 4.26E-06 |                                                 | 6 <sup>05</sup> 3 <sup>4</sup> 2 <sup>3</sup> 1 |
| 5398.094  | 2.73E-04 | 6 <sup>83</sup> 2                               |                                                | 5576.354  | 2.32E-03 | 6 <sup>05</sup> 14 <sup>2</sup> 3 <sup>2</sup>  |                                                 |
| 5408.0808 | 3.06E-04 |                                                 | 5 <sup>14</sup> 3 <sup>3</sup> 1               | 5580.835  | 2.92E-06 |                                                 | 6 <sup>05</sup> 14 <sup>1</sup> 1 <sup>1</sup>  |
| 5409.9069 | 9.13E-04 | 6 <sup>25</sup> 14 <sup>2</sup> 2 <sup>1</sup>  |                                                | 5585.066  | 1.97E-04 |                                                 |                                                 |
| 5411.056  | 5.65E-04 |                                                 | 5 <sup>13</sup> 2 <sup>2</sup> 1               | 5586.936  | 5.68E-05 |                                                 | 6 <sup>25</sup> 2 <sup>4</sup> 1 <sup>3</sup> 1 |
| 5416.215  | 3.92E-04 |                                                 | 6 <sup>25</sup> 14 <sup>2</sup> 3 <sup>1</sup> | 5589.981  | 1.96E-04 | 6 <sup>45</sup> 6                               |                                                 |
| 5417.999  | 9.54E-04 |                                                 |                                                | 5591.401  | 7.80E-04 |                                                 | 6 <sup>25</sup> 5 <sup>4</sup> 1                |
| 5421.125  | 4.85E-03 | 4 <sup>63</sup> 2                               |                                                | 5596.928  | 1.90E-04 |                                                 | 5 <sup>14</sup> 2 <sup>3</sup> 2                |
| 5422.57   | 1.81E-03 | 4 <sup>33</sup> 2                               |                                                | 5597.351  | 4.84E-04 |                                                 |                                                 |
| 5425.712  | 1.67E-04 | 6 <sup>85</sup> 2 <sup>3</sup> 1                |                                                | 5599.453  | 1.12E-03 | 6 <sup>25</sup> 2 <sup>4</sup> 1 <sup>3</sup> 2 |                                                 |
| 5430.461  | 3.36E-04 |                                                 | 6 <sup>45</sup> 2 <sup>2</sup> 1               | 5604.386  | 1.12E-04 | 6 <sup>65</sup> 2 <sup>2</sup> 1                |                                                 |
| 5432.053  | 1.05E-03 | 5 <sup>23</sup> 1 <sup>2</sup> 1                |                                                | 5613.886  | 8.65E-05 |                                                 |                                                 |
| 5438.992  | 1.73E-03 | 6 <sup>45</sup> 2 <sup>3</sup> 2                |                                                | 5614.076  | 2.75E-04 | 6 <sup>25</sup> 2 <sup>4</sup> 1 <sup>3</sup> 2 |                                                 |
| 5443.786  | 9.28E-05 |                                                 |                                                | 5618.453  | 2.33E-04 |                                                 |                                                 |
| 5445.661  | 3.82E-03 |                                                 |                                                | 5618.975  | 3.30E-04 |                                                 |                                                 |
| 5453.286  | 1.48E-04 |                                                 | 3 <sup>12</sup> 2                              | 5620.554  | 1.36E-03 | 6 <sup>24</sup> 1 <sup>2</sup> 2                |                                                 |
| 5460.37   | 3.86E-03 | 5 <sup>73</sup> 1                               |                                                | 5622.2131 | 8.95E-04 | 6 <sup>23</sup> 4                               |                                                 |
| 5461.336  | 5.95E-04 |                                                 |                                                | 5623.5322 | 1.32E-04 |                                                 |                                                 |
| 5480.102  | 1.31E-03 |                                                 | 5 <sup>23</sup> 2                              | 5637.0791 | 3.92E-04 | 6 <sup>25</sup> 3 <sup>4</sup> 1 <sup>2</sup> 1 |                                                 |
| 5492.855  | 7.09E-04 |                                                 |                                                | 5638.2516 | 1.11E-03 |                                                 |                                                 |

| Energy    | Lifetime | <i>trans</i>                                                | <i>cis</i>                                                  | Energy    | Lifetime | <i>trans</i>                                                | <i>cis</i>                                                  |
|-----------|----------|-------------------------------------------------------------|-------------------------------------------------------------|-----------|----------|-------------------------------------------------------------|-------------------------------------------------------------|
| 5641.1143 | 1.12E-03 |                                                             |                                                             | 5808.7204 | 2.50E-04 |                                                             |                                                             |
| 5646.4752 | 1.44E-03 |                                                             | 6 <sup>2</sup> 4 <sup>1</sup> 3 <sup>1</sup> 2 <sup>1</sup> | 5810.6474 | 4.59E-05 |                                                             |                                                             |
| 5649.1786 | 5.85E-04 | 6 <sup>2</sup> 5 <sup>1</sup> 4 <sup>4</sup>                |                                                             | 5814.938  | 1.93E-05 | 6 <sup>4</sup> 5 <sup>1</sup> 4 <sup>1</sup> 3 <sup>2</sup> | 6 <sup>2</sup> 5 <sup>3</sup> 3 <sup>2</sup>                |
| 5655.4066 | 2.34E-03 | 6 <sup>6</sup> 5 <sup>5</sup>                               |                                                             | 5818.109  | 1.34E-04 |                                                             | 6 <sup>2</sup> 5 <sup>5</sup> 3 <sup>1</sup>                |
| 5657.2431 | 5.10E-04 |                                                             |                                                             | 5821.3244 | 2.51E-05 |                                                             | 6 <sup>2</sup> 5 <sup>4</sup> 2 <sup>1</sup>                |
| 5660.5339 | 2.42E-04 | 6 <sup>4</sup> 5 <sup>1</sup> 4 <sup>2</sup> 3 <sup>1</sup> |                                                             | 5823.3415 | 1.22E-03 |                                                             |                                                             |
| 5661.6721 | 3.25E-04 |                                                             | 6 <sup>2</sup> 5 <sup>1</sup> 4 <sup>1</sup> 3 <sup>2</sup> | 5826.7126 | 8.90E-05 | 6 <sup>2</sup> 5 <sup>3</sup> 2 <sup>2</sup>                |                                                             |
| 5667.5141 | 2.54E-03 | 6 <sup>2</sup> 5 <sup>4</sup> 4 <sup>1</sup> 3 <sup>1</sup> |                                                             | 5829.1459 | 2.22E-05 |                                                             |                                                             |
| 5673.7838 | 4.33E-04 | 6 <sup>6</sup> 5 <sup>3</sup> 3 <sup>1</sup>                |                                                             | 5829.393  | 5.70E-06 |                                                             | 5 <sup>3</sup> 4 <sup>1</sup> 3 <sup>2</sup>                |
| 5687.9845 | 1.15E-03 | 6 <sup>6</sup> 3 <sup>1</sup> 2 <sup>1</sup>                |                                                             | 5830.331  | 1.40E-03 | 6 <sup>2</sup> 5 <sup>2</sup> 1 <sup>1</sup>                |                                                             |
| 5689.2077 | 3.78E-04 | 6 <sup>6</sup> 5 <sup>2</sup> 2 <sup>1</sup>                |                                                             | 5831.797  | 3.21E-03 | 6 <sup>2</sup> 3 <sup>1</sup> 1 <sup>1</sup>                |                                                             |
| 5692.6283 | 6.29E-04 | 4 <sup>1</sup> 3 <sup>1</sup>                               |                                                             | 5836.089  | 1.33E-04 |                                                             | 6 <sup>2</sup> 5 <sup>3</sup> 4 <sup>1</sup> 3 <sup>2</sup> |
| 5694.3793 | 6.79E-04 |                                                             |                                                             | 5839.517  | 1.14E-04 |                                                             |                                                             |
| 5698.7112 | 2.88E-04 |                                                             |                                                             | 5842.636  | 5.36E-04 | 6 <sup>2</sup> 5 <sup>6</sup> 3 <sup>1</sup>                |                                                             |
| 5702.8885 | 2.37E-06 |                                                             |                                                             | 5849.257  | 5.92E-04 | 5 <sup>1</sup> 4 <sup>4</sup> 3 <sup>1</sup>                |                                                             |
| 5705.5386 | 6.79E-06 |                                                             |                                                             | 5855.722  | 2.74E-04 |                                                             | 6 <sup>2</sup> 5 <sup>1</sup> 3 <sup>3</sup>                |
| 5720.1111 | 4.02E-04 |                                                             |                                                             | 5857.27   | 3.08E-04 |                                                             |                                                             |
| 5723.2107 | 1.46E-06 |                                                             | 5 <sup>7</sup> 4 <sup>1</sup>                               | 5861.072  | 7.18E-04 |                                                             |                                                             |
| 5725.9601 | 1.87E-06 |                                                             | 6 <sup>2</sup> 5 <sup>7</sup>                               | 5864.495  | 1.20E-04 |                                                             |                                                             |
| 5726.3499 | 6.86E-06 | 6 <sup>2</sup> 5 <sup>2</sup> 3 <sup>3</sup>                |                                                             | 5868.844  | 4.28E-04 |                                                             |                                                             |
| 5729.1212 | 6.87E-06 |                                                             |                                                             | 5869.883  | 2.21E-04 | 5 <sup>3</sup> 4 <sup>1</sup> 3 <sup>1</sup> 2 <sup>1</sup> |                                                             |
| 5731.7717 | 2.22E-06 |                                                             |                                                             | 5872.977  | 3.61E-04 |                                                             | 5 <sup>1</sup> 4 <sup>1</sup> 3 <sup>3</sup>                |
| 5738.2274 | 1.93E-06 |                                                             | 5 <sup>3</sup> 1 <sup>1</sup>                               | 5877.022  | 7.56E-04 |                                                             |                                                             |
| 5741.7732 | 8.91E-05 | 6 <sup>6</sup> 4 <sup>2</sup> 3 <sup>1</sup>                |                                                             | 5878.876  | 2.75E-04 | 6 <sup>4</sup> 4 <sup>1</sup> 3 <sup>1</sup> 2 <sup>1</sup> |                                                             |
| 5745.8064 | 2.24E-05 |                                                             | 5 <sup>1</sup> 3 <sup>1</sup> 1 <sup>1</sup>                | 5883.873  | 1.11E-04 | 6 <sup>2</sup> 5 <sup>1</sup> 4 <sup>3</sup> 1              |                                                             |
| 5751.2946 | 3.73E-04 |                                                             | 6 <sup>4</sup> 4 <sup>2</sup> 3 <sup>1</sup>                | 5885.764  | 2.86E-04 |                                                             | 6 <sup>4</sup> 4 <sup>1</sup> 3 <sup>2</sup>                |
| 5755.0994 | 2.16E-05 |                                                             |                                                             | 5889.534  | 1.90E-04 |                                                             |                                                             |
| 5770.4595 | 5.13E-05 |                                                             |                                                             | 5890.36   | 2.77E-04 | 6 <sup>6</sup> 5 <sup>2</sup> 4 <sup>1</sup> 3 <sup>1</sup> |                                                             |
| 5770.9131 | 9.62E-06 |                                                             |                                                             | 5892.658  | 1.27E-04 | 6 <sup>2</sup> 5 <sup>2</sup> 2 <sup>2</sup>                |                                                             |
| 5776.7002 | 1.69E-05 |                                                             |                                                             | 5893.992  | 6.28E-04 |                                                             |                                                             |
| 5778.948  | 5.40E-05 |                                                             |                                                             | 5898.399  | 6.84E-04 | 4 <sup>4</sup> 2 <sup>1</sup>                               |                                                             |
| 5780.5683 | 7.68E-06 |                                                             |                                                             | 5899.46   | 4.77E-04 | 6 <sup>4</sup> 5 <sup>5</sup> 4 <sup>1</sup>                |                                                             |
| 5781.3732 | 2.91E-05 | 6 <sup>2</sup> 5 <sup>2</sup> 2 <sup>2</sup>                |                                                             | 5903.148  | 2.02E-04 |                                                             |                                                             |
| 5785.01   | 7.96E-04 | 3 <sup>5</sup>                                              |                                                             | 5903.678  | 1.53E-03 |                                                             |                                                             |
| 5786.9297 | 9.79E-05 |                                                             | 4 <sup>4</sup> 3 <sup>1</sup>                               | 5907.347  | 3.55E-06 | 6 <sup>2</sup> 5 <sup>2</sup> 2 <sup>2</sup>                |                                                             |
| 5787.7115 | 3.24E-06 |                                                             | 6 <sup>2</sup> 5 <sup>2</sup> 4 <sup>3</sup>                | 5908.405  | 2.62E-07 |                                                             | 5 <sup>4</sup> 4 <sup>3</sup>                               |
| 5789.2524 | 1.46E-05 | 6 <sup>2</sup> 3 <sup>1</sup> 2 <sup>2</sup>                |                                                             | 5910.937  | 7.39E-05 |                                                             | 6 <sup>4</sup> 5 <sup>2</sup> 4 <sup>1</sup> 3 <sup>1</sup> |
| 5791.9668 | 2.10E-06 | 6 <sup>6</sup> 5 <sup>2</sup> 4 <sup>2</sup>                |                                                             | 5912.536  | 1.79E-05 | 6 <sup>2</sup> 3 <sup>1</sup> 2 <sup>2</sup>                |                                                             |
| 5793.1649 | 5.52E-05 | 6 <sup>2</sup> 5 <sup>1</sup> 4 <sup>3</sup> 3 <sup>1</sup> |                                                             | 5922.295  | 7.50E-06 |                                                             |                                                             |
| 5799.2127 | 5.01E-04 |                                                             |                                                             | 5924.176  | 3.85E-06 |                                                             |                                                             |
| 5803.4222 | 9.43E-06 |                                                             | 6 <sup>2</sup> 5 <sup>2</sup> 3 <sup>1</sup> 2 <sup>1</sup> | 5926.388  | 4.16E-06 |                                                             |                                                             |
| 5806.7093 | 6.03E-04 |                                                             |                                                             | 5928.272  | 3.52E-06 |                                                             |                                                             |

| Energy    | Lifetime | <i>trans</i>                                                | <i>cis</i>                                                  | Energy    | Lifetime | <i>trans</i>                                                | <i>cis</i>                                                  |
|-----------|----------|-------------------------------------------------------------|-------------------------------------------------------------|-----------|----------|-------------------------------------------------------------|-------------------------------------------------------------|
| 5929.717  | 3.47E-05 |                                                             | 6 <sup>4</sup> 1 <sup>1</sup>                               | 6052.7912 | 5.04E-05 | 6 <sup>4</sup> 3 <sup>2</sup> 2 <sup>1</sup>                |                                                             |
| 5931.549  | 3.01E-05 |                                                             | 6 <sup>4</sup> 5 <sup>4</sup> 4 <sup>1</sup>                | 6054.4766 | 3.25E-05 | 6 <sup>6</sup> 4 <sup>1</sup> 3 <sup>2</sup>                |                                                             |
| 5934.155  | 1.14E-05 |                                                             | 6 <sup>2</sup> 4 <sup>1</sup> 3 <sup>1</sup> 2 <sup>1</sup> | 6058.5787 | 1.05E-04 |                                                             |                                                             |
| 5936.153  | 9.23E-06 |                                                             | 5 <sup>9</sup>                                              | 6061.7224 | 3.57E-05 |                                                             |                                                             |
| 5939.974  | 1.70E-04 | 6 <sup>4</sup> 4 <sup>4</sup>                               |                                                             | 6063.9118 | 7.68E-05 |                                                             |                                                             |
| 5942.545  | 6.45E-04 | 6 <sup>4</sup> 5 <sup>1</sup> 3 <sup>3</sup>                |                                                             | 6066.7558 | 2.06E-04 |                                                             |                                                             |
| 5945.953  | 2.15E-04 | 6 <sup>2</sup> 4 <sup>5</sup>                               |                                                             | 6067.0386 | 2.98E-04 |                                                             |                                                             |
| 5951.138  | 1.05E-04 |                                                             |                                                             | 6068.4752 | 1.99E-04 |                                                             |                                                             |
| 5954.588  | 4.27E-06 |                                                             | 6 <sup>4</sup> 5 <sup>2</sup> 4 <sup>1</sup> 3 <sup>1</sup> | 6069.2064 | 1.07E-03 | 5 <sup>8</sup> 3 <sup>1</sup>                               |                                                             |
| 5958.881  | 1.28E-04 | 6 <sup>6</sup> 5 <sup>2</sup> 4 <sup>1</sup> 3 <sup>1</sup> |                                                             | 6078.0294 | 3.25E-05 | 5 <sup>4</sup> 1 <sup>1</sup>                               |                                                             |
| 5961.228  | 1.74E-04 | 6 <sup>2</sup> 5 <sup>1</sup> 4 <sup>2</sup> 3 <sup>2</sup> |                                                             | 6081.1661 | 5.65E-05 |                                                             |                                                             |
| 5964.496  | 3.18E-06 |                                                             | 5 <sup>2</sup> 4 <sup>3</sup> 3 <sup>1</sup>                | 6083.4569 | 2.31E-05 |                                                             |                                                             |
| 5967.145  | 2.56E-05 |                                                             |                                                             | 6084.7362 | 4.74E-05 | 6 <sup>4</sup> 5 <sup>1</sup> 1 <sup>1</sup>                |                                                             |
| 5968.027  | 4.49E-03 | 5 <sup>4</sup> 3 <sup>3</sup>                               |                                                             | 6090.4314 | 4.66E-05 |                                                             |                                                             |
| 5972.534  | 8.33E-06 |                                                             |                                                             | 6094.9551 | 1.50E-05 |                                                             |                                                             |
| 5974.826  | 2.53E-06 |                                                             | 6 <sup>2</sup> 5 <sup>2</sup> 4 <sup>2</sup> 3 <sup>1</sup> | 6097.8344 | 1.22E-05 |                                                             | 6 <sup>4</sup> 5 <sup>2</sup> 4 <sup>1</sup> 3 <sup>1</sup> |
| 5978.692  | 8.11E-05 | 5 <sup>4</sup> 4 <sup>3</sup> 3 <sup>1</sup>                |                                                             | 6098.7036 | 7.36E-06 |                                                             | 4 <sup>3</sup> 3 <sup>2</sup>                               |
| 5984.879  | 2.09E-04 | 5 <sup>2</sup> 3 <sup>1</sup> 1 <sup>1</sup>                |                                                             | 6102.0412 | 1.51E-07 |                                                             | 5 <sup>6</sup> 4 <sup>2</sup>                               |
| 5986.566  | 2.26E-05 |                                                             |                                                             | 6105.5332 | 1.64E-05 |                                                             |                                                             |
| 5987.325  | 1.04E-03 | 3 <sup>2</sup> 1 <sup>1</sup>                               |                                                             | 6106.7341 | 2.11E-05 | 5 <sup>4</sup> 2 <sup>2</sup>                               |                                                             |
| 5988.8559 | 9.60E-06 |                                                             |                                                             | 6109.2092 | 1.68E-05 |                                                             |                                                             |
| 5991.7911 | 1.40E-04 |                                                             |                                                             | 6111.8347 | 5.45E-04 | 6 <sup>2</sup> 5 <sup>1</sup> 4 <sup>1</sup> 3 <sup>3</sup> |                                                             |
| 5994.8319 | 1.78E-04 |                                                             |                                                             | 6115.0962 | 4.22E-05 | 5 <sup>2</sup> 3 <sup>1</sup> 2 <sup>2</sup>                |                                                             |
| 5998.3932 | 1.48E-06 |                                                             | 5 <sup>7</sup> 3 <sup>1</sup>                               | 6115.9352 | 1.04E-05 |                                                             |                                                             |
| 5998.9837 | 3.44E-05 |                                                             |                                                             | 6116.9817 | 4.04E-07 |                                                             |                                                             |
| 6000.8406 | 3.37E-06 |                                                             |                                                             | 6120.4108 | 2.34E-04 | 3 <sup>2</sup> 2 <sup>2</sup>                               |                                                             |
| 6004.9579 | 7.56E-06 | 6 <sup>4</sup> 4 <sup>3</sup> 3 <sup>1</sup>                |                                                             | 6122.1261 | 4.00E-06 |                                                             | 6 <sup>4</sup> 5 <sup>4</sup> 3 <sup>1</sup>                |
| 6006.4421 | 6.34E-06 | 6 <sup>2</sup> 5 <sup>1</sup> 4 <sup>2</sup> 3 <sup>2</sup> |                                                             | 6126.9766 | 2.76E-05 |                                                             |                                                             |
| 6009.7738 | 8.23E-05 | 6 <sup>2</sup> 5 <sup>3</sup> 4 <sup>2</sup> 3 <sup>1</sup> |                                                             | 6129.2154 | 1.20E-05 |                                                             |                                                             |
| 6013.9949 | 1.56E-03 |                                                             |                                                             | 6130.5154 | 1.95E-06 |                                                             | 6 <sup>2</sup> 4 <sup>1</sup> 2 <sup>2</sup>                |
| 6017.9881 | 5.24E-05 | 6 <sup>6</sup> 5 <sup>1</sup> 4 <sup>1</sup> 2 <sup>1</sup> |                                                             | 6132.7367 | 3.73E-06 |                                                             | 5 <sup>1</sup> 3 <sup>4</sup>                               |
| 6020.391  | 6.94E-04 | 5 <sup>1</sup> 4 <sup>3</sup> 3 <sup>2</sup>                |                                                             | 6134.175  | 3.30E-05 |                                                             | 5 <sup>2</sup> 4 <sup>1</sup> 1 <sup>1</sup>                |
| 6026.8322 | 5.17E-06 |                                                             | 6 <sup>4</sup> 5 <sup>6</sup>                               | 6138.358  | 2.42E-05 |                                                             |                                                             |
| 6031.0744 | 4.16E-05 |                                                             | 4 <sup>2</sup> 1 <sup>1</sup>                               | 6143.255  | 1.28E-05 |                                                             |                                                             |
| 6035.1063 | 1.16E-04 |                                                             |                                                             | 6143.584  | 2.37E-05 |                                                             |                                                             |
| 6036.5712 | 1.43E-05 | 6 <sup>4</sup> 4 <sup>3</sup> 3 <sup>1</sup>                |                                                             | 6145.17   | 3.07E-06 |                                                             |                                                             |
| 6037.4503 | 1.63E-05 | 6 <sup>2</sup> 4 <sup>2</sup> 3 <sup>1</sup> 2 <sup>1</sup> |                                                             | 6146.871  | 1.02E-06 |                                                             | 6 <sup>2</sup> 5 <sup>6</sup> 4 <sup>1</sup>                |
| 6039.0935 | 4.26E-06 |                                                             | 6 <sup>2</sup> 4 <sup>2</sup> 3 <sup>2</sup>                | 6149.037  | 1.64E-05 |                                                             |                                                             |
| 6043.2237 | 1.77E-05 |                                                             |                                                             | 6153.97   | 1.95E-04 | 5 <sup>10</sup>                                             |                                                             |
| 6044.393  | 8.20E-04 |                                                             |                                                             | 6157.43   | 2.28E-06 |                                                             |                                                             |
| 6046.4688 | 2.30E-04 |                                                             |                                                             | 6158.674  | 2.08E-04 |                                                             |                                                             |
| 6048.9429 | 2.47E-06 |                                                             |                                                             | 6160.771  | 6.25E-07 |                                                             |                                                             |

| Energy   | Lifetime | <i>trans</i>                                                | <i>cis</i>                                                  | Energy    | Lifetime | <i>trans</i>                                                | <i>cis</i>                                                  |
|----------|----------|-------------------------------------------------------------|-------------------------------------------------------------|-----------|----------|-------------------------------------------------------------|-------------------------------------------------------------|
| 6161.61  | 1.69E-06 |                                                             |                                                             | 6260.52   | 5.50E-05 |                                                             |                                                             |
| 6163.417 | 4.49E-05 |                                                             |                                                             | 6262.316  | 3.99E-05 |                                                             |                                                             |
| 6163.972 | 8.55E-07 |                                                             |                                                             | 6263.7598 | 2.91E-04 | 6 <sup>6</sup> 2 <sup>2</sup>                               |                                                             |
| 6169.224 | 1.30E-05 | 6 <sup>6</sup> 5 <sup>2</sup> 3 <sup>2</sup>                |                                                             | 6269.8023 | 3.47E-05 |                                                             |                                                             |
| 6170.481 | 2.14E-07 |                                                             | 6 <sup>4</sup> 5 <sup>2</sup> 3 <sup>2</sup>                | 6273.2125 | 7.68E-06 |                                                             |                                                             |
| 6171.578 | 1.49E-06 | 6 <sup>2</sup> 5 <sup>3</sup> 4 <sup>1</sup> 3 <sup>2</sup> |                                                             | 6275.0405 | 2.13E-05 |                                                             |                                                             |
| 6172.751 | 1.57E-06 | 5 <sup>3</sup> 4 <sup>2</sup> 3 <sup>2</sup>                |                                                             | 6279.4569 | 1.01E-05 |                                                             |                                                             |
| 6174.159 | 5.81E-07 |                                                             |                                                             | 6284.3222 | 4.52E-05 | 6 <sup>6</sup> 5 <sup>1</sup> 4 <sup>3</sup>                |                                                             |
| 6177.417 | 2.90E-06 |                                                             | 6 <sup>2</sup> 4 <sup>2</sup> 2 <sup>1</sup>                | 6286.5927 | 9.58E-06 |                                                             |                                                             |
| 6178.557 | 1.60E-05 |                                                             |                                                             | 6290.2974 | 2.45E-05 |                                                             |                                                             |
| 6184.258 | 1.43E-06 |                                                             | 6 <sup>2</sup> 5 <sup>2</sup> 1 <sup>1</sup>                | 6290.5198 | 6.99E-07 |                                                             |                                                             |
| 6186.412 | 1.03E-04 | 6 <sup>6</sup> 1 <sup>1</sup>                               |                                                             | 6292.1345 | 6.15E-07 | 6 <sup>6</sup> 5 <sup>1</sup> 4 <sup>3</sup>                |                                                             |
| 6189.369 | 8.02E-05 |                                                             |                                                             | 6298.487  | 3.49E-07 | 6 <sup>6</sup> 5 <sup>1</sup> 3 <sup>1</sup> 2 <sup>1</sup> |                                                             |
| 6193.299 | 1.62E-04 | 6 <sup>2</sup> 5 <sup>4</sup> 4 <sup>1</sup> 2 <sup>1</sup> |                                                             | 6301.1695 | 1.39E-07 |                                                             | 6 <sup>2</sup> 5 <sup>1</sup> 4 <sup>3</sup> 3 <sup>1</sup> |
| 6196.572 | 2.53E-04 | 6 <sup>4</sup> 5 <sup>4</sup> 4 <sup>2</sup>                |                                                             | 6302.0203 | 2.43E-07 |                                                             | 6 <sup>2</sup> 4 <sup>3</sup> 2 <sup>1</sup>                |
| 6197.826 | 8.95E-04 | 6 <sup>6</sup> 5 <sup>2</sup> 3 <sup>2</sup>                |                                                             | 6305.9745 | 4.33E-05 | 6 <sup>2</sup> 5 <sup>2</sup> 4 <sup>4</sup>                |                                                             |
| 6201.542 | 6.82E-06 | 6 <sup>6</sup> 5 <sup>3</sup> 2 <sup>1</sup>                |                                                             | 6311.1656 | 2.03E-05 |                                                             | 6 <sup>2</sup> 5 <sup>1</sup> 4 <sup>1</sup> 3 <sup>2</sup> |
| 6202.474 | 3.35E-04 | 6 <sup>2</sup> 5 <sup>5</sup> 4 <sup>1</sup> 3 <sup>1</sup> |                                                             | 6312.4881 | 1.28E-05 |                                                             | 6 <sup>2</sup> 4 <sup>1</sup> 3 <sup>2</sup>                |
| 6203.639 | 2.03E-05 | 6 <sup>4</sup> 4 <sup>2</sup> 3 <sup>2</sup>                |                                                             | 6319.4958 | 9.69E-07 |                                                             |                                                             |
| 6204.757 | 1.83E-06 |                                                             | 6 <sup>2</sup> 5 <sup>2</sup> 4 <sup>1</sup> 3 <sup>2</sup> | 6320.9716 | 1.74E-07 |                                                             | 5 <sup>1</sup> 4 <sup>4</sup> 3 <sup>1</sup>                |
| 6206.896 | 1.68E-05 |                                                             | 5 <sup>2</sup> 1 <sup>1</sup>                               | 6324.6614 | 9.53E-06 |                                                             |                                                             |
| 6207.324 | 1.25E-04 |                                                             |                                                             | 6326.9455 | 7.09E-07 | 6 <sup>4</sup> 4 <sup>1</sup> 3 <sup>3</sup>                |                                                             |
| 6209.7   | 1.64E-05 |                                                             | 6 <sup>4</sup> 5 <sup>2</sup> 3 <sup>2</sup>                | 6329.1411 | 7.93E-07 |                                                             | 5 <sup>4</sup> 1 <sup>1</sup>                               |
| 6211.523 | 7.99E-05 |                                                             |                                                             | 6330.0045 | 1.02E-06 |                                                             |                                                             |
| 6212.007 | 3.04E-05 |                                                             |                                                             | 6330.8148 | 3.53E-07 |                                                             |                                                             |
| 6214.684 | 2.90E-06 |                                                             | 4 <sup>2</sup> 3 <sup>3</sup>                               | 6333.7958 | 2.63E-06 | 6 <sup>4</sup> 4 <sup>1</sup> 3 <sup>3</sup>                |                                                             |
| 6215.501 | 9.41E-05 | 6 <sup>2</sup> 4 <sup>1</sup> 3 <sup>2</sup> 2 <sup>1</sup> |                                                             | 6334.8475 | 4.74E-06 |                                                             |                                                             |
| 6219.531 | 7.73E-05 |                                                             |                                                             | 6334.966  | 1.60E-05 | 6 <sup>2</sup> 5 <sup>3</sup> 3 <sup>3</sup>                |                                                             |
| 6221.817 | 1.36E-05 |                                                             |                                                             | 6336.5177 | 2.48E-05 |                                                             |                                                             |
| 6222.901 | 1.02E-04 | 6 <sup>2</sup> 5 <sup>3</sup> 4 <sup>1</sup> 3 <sup>2</sup> |                                                             | 6340.3066 | 2.38E-05 |                                                             |                                                             |
| 6224.741 | 2.17E-04 | 6 <sup>2</sup> 4 <sup>4</sup> 3 <sup>1</sup>                |                                                             | 6344.4611 | 3.53E-05 |                                                             |                                                             |
| 6229.239 | 2.99E-05 | 6 <sup>2</sup> 5 <sup>1</sup> 4 <sup>1</sup> 2 <sup>2</sup> |                                                             | 6348.1986 | 6.80E-06 |                                                             |                                                             |
| 6235.85  | 1.54E-04 |                                                             | 6 <sup>2</sup> 4 <sup>1</sup> 2 <sup>2</sup>                | 6350.7952 | 5.42E-06 |                                                             |                                                             |
| 6237.289 | 1.66E-04 | 6 <sup>2</sup> 5 <sup>1</sup> 4 <sup>1</sup> 1 <sup>1</sup> |                                                             | 6353.4076 | 4.46E-07 |                                                             |                                                             |
| 6238.973 | 2.19E-05 |                                                             | 6 <sup>2</sup> 5 <sup>4</sup> 4 <sup>1</sup> 3 <sup>1</sup> | 6354.1033 | 3.09E-06 |                                                             |                                                             |
| 6242.031 | 2.40E-05 |                                                             |                                                             | 6356.1257 | 8.09E-06 |                                                             |                                                             |
| 6242.952 | 1.08E-05 |                                                             |                                                             | 6356.8056 | 2.02E-06 | 6 <sup>2</sup> 5 <sup>2</sup> 4 <sup>3</sup> 3 <sup>1</sup> |                                                             |
| 6245.792 | 1.39E-04 |                                                             |                                                             | 6357.646  | 7.52E-07 |                                                             | 6 <sup>2</sup> 4 <sup>3</sup> 2 <sup>1</sup>                |
| 6249.344 | 1.49E-05 |                                                             |                                                             | 6362.1869 | 6.07E-06 |                                                             |                                                             |
| 6250.114 | 4.24E-05 |                                                             |                                                             | 6365.5552 | 7.31E-07 |                                                             | 6 <sup>2</sup> 5 <sup>2</sup> 2 <sup>2</sup>                |
| 6251.68  | 3.27E-04 |                                                             |                                                             | 6369.6511 | 1.28E-05 |                                                             | 6 <sup>2</sup> 5 <sup>6</sup> 3 <sup>1</sup>                |
| 6258.49  | 1.76E-04 |                                                             |                                                             | 6371.1746 | 2.71E-06 |                                                             |                                                             |

| Energy    | Lifetime | <i>trans</i>                                                               | <i>cis</i>                                                  | Energy    | Lifetime | <i>trans</i>                                                | <i>cis</i>                                   |
|-----------|----------|----------------------------------------------------------------------------|-------------------------------------------------------------|-----------|----------|-------------------------------------------------------------|----------------------------------------------|
| 6372.3235 | 5.11E-06 |                                                                            |                                                             | 6460.805  | 1.57E-05 |                                                             |                                              |
| 6378.436  | 1.52E-05 |                                                                            |                                                             | 6462.282  | 2.76E-05 |                                                             |                                              |
| 6379.5359 | 6.05E-06 | 6 <sup>2</sup> 4 <sup>2</sup> 3 <sup>2</sup>                               |                                                             | 6466.214  | 1.07E-05 |                                                             |                                              |
| 6381.0089 | 9.90E-07 |                                                                            |                                                             | 6467.828  | 2.30E-04 |                                                             |                                              |
| 6384.311  | 1.80E-05 | 6 <sup>2</sup> 5 <sup>1</sup> 4 <sup>3</sup> 2 <sup>1</sup>                |                                                             | 6469.958  | 5.86E-06 |                                                             |                                              |
| 6386.3971 | 3.26E-04 | 6 <sup>0</sup> 5 <sup>1</sup> 3 <sup>5</sup>                               |                                                             | 6471.694  | 6.99E-06 |                                                             |                                              |
| 6387.7691 | 2.99E-06 |                                                                            |                                                             | 6475.361  | 4.48E-05 |                                                             |                                              |
| 6389.813  | 6.68E-05 |                                                                            |                                                             | 6477.194  | 9.86E-06 | 6 <sup>6</sup> 4 <sup>2</sup> 2 <sup>1</sup>                |                                              |
| 6390.0618 | 5.20E-07 |                                                                            |                                                             | 6479.984  | 5.39E-05 | 6 <sup>2</sup> 5 <sup>1</sup> 4 <sup>3</sup> 2 <sup>1</sup> |                                              |
| 6391.7097 | 1.89E-06 |                                                                            |                                                             | 6482.257  | 2.15E-04 | 6 <sup>0</sup> 5 <sup>3</sup> 4 <sup>1</sup> 1 <sup>1</sup> |                                              |
| 6392.6852 | 9.58E-06 |                                                                            |                                                             | 6483.124  | 5.66E-05 |                                                             |                                              |
| 6392.8147 | 1.92E-06 |                                                                            |                                                             | 6486.45   | 2.17E-06 |                                                             |                                              |
| 6393.6974 | 2.19E-07 |                                                                            | 5 <sup>6</sup> 4 <sup>1</sup> 3 <sup>1</sup>                | 6487.878  | 2.98E-05 | 6 <sup>4</sup> 4 <sup>1</sup> 1 <sup>1</sup>                |                                              |
| 6394.3583 | 1.71E-06 |                                                                            |                                                             | 6489.014  | 2.06E-06 | 6 <sup>0</sup> 5 <sup>1</sup> 4 <sup>2</sup> 2 <sup>1</sup> |                                              |
| 6395.088  | 7.30E-07 |                                                                            | 5 <sup>2</sup> 3 <sup>1</sup> 1 <sup>1</sup>                | 6490.201  | 1.81E-05 |                                                             | 4 <sup>1</sup> 3 <sup>4</sup>                |
| 6400.465  | 2.86E-05 |                                                                            | 6 <sup>2</sup> 5 <sup>3</sup> 3 <sup>1</sup> 2 <sup>1</sup> | 6491.571  | 1.65E-07 | 5 <sup>3</sup> 3 <sup>4</sup>                               |                                              |
| 6401.595  | 1.12E-06 | 6 <sup>4</sup> 5 <sup>2</sup> 4 <sup>1</sup> 3 <sup>2</sup>                |                                                             | 6492.824  | 5.17E-08 |                                                             | 5 <sup>5</sup> 4 <sup>3</sup>                |
| 6404.962  | 2.35E-06 | 6 <sup>2</sup> 5 <sup>2</sup> 3 <sup>2</sup> 2 <sup>1</sup>                |                                                             | 6494.256  | 1.17E-05 |                                                             | 6 <sup>2</sup> 5 <sup>2</sup> 3 <sup>3</sup> |
| 6406.724  | 1.69E-06 |                                                                            |                                                             | 6494.914  | 1.22E-07 | 6 <sup>2</sup> 5 <sup>4</sup> 4 <sup>2</sup> 3 <sup>1</sup> |                                              |
| 6409.411  | 3.63E-06 |                                                                            |                                                             | 6498.51   | 4.11E-06 |                                                             | 5 <sup>4</sup> 4 <sup>1</sup> 3 <sup>2</sup> |
| 6415.555  | 1.57E-04 | 6 <sup>2</sup> 5 <sup>1</sup> 4 <sup>3</sup> 2 <sup>1</sup>                |                                                             | 6499.8    | 2.28E-06 | 6 <sup>4</sup> 5 <sup>2</sup> 3 <sup>3</sup>                |                                              |
| 6417.024  | 1.05E-04 | 6 <sup>4</sup> 3 <sup>4</sup>                                              |                                                             | 6501.571  | 9.11E-07 |                                                             |                                              |
| 6418.196  | 6.33E-07 |                                                                            | 6 <sup>2</sup> 5 <sup>4</sup> 3 <sup>2</sup>                | 6504.58   | 6.95E-07 |                                                             | 5 <sup>2</sup> 4 <sup>3</sup> 3 <sup>1</sup> |
| 6421.555  | 3.36E-06 | 6 <sup>4</sup> 5 <sup>1</sup> 4 <sup>1</sup> 3 <sup>1</sup> 2 <sup>1</sup> |                                                             | 6504.748  | 2.04E-06 |                                                             |                                              |
| 6423.159  | 3.22E-06 |                                                                            | 5 <sup>2</sup> 4 <sup>1</sup> 3 <sup>3</sup>                | 6505.231  | 1.14E-05 |                                                             |                                              |
| 6423.74   | 1.63E-04 |                                                                            |                                                             | 6507.752  | 2.47E-06 |                                                             |                                              |
| 6426.203  | 6.56E-06 | 6 <sup>4</sup> 5 <sup>2</sup> 4 <sup>3</sup> 3 <sup>1</sup>                |                                                             | 6509.4436 | 8.49E-07 |                                                             |                                              |
| 6428.474  | 4.04E-06 |                                                                            |                                                             | 6512.4865 | 1.95E-05 | 6 <sup>2</sup> 4 <sup>2</sup> 3 <sup>3</sup>                |                                              |
| 6428.752  | 1.47E-06 |                                                                            |                                                             | 6513.4179 | 1.25E-05 |                                                             |                                              |
| 6430.206  | 3.01E-05 |                                                                            |                                                             | 6514.403  | 2.32E-05 |                                                             |                                              |
| 6433.849  | 6.02E-06 |                                                                            | 5 <sup>1</sup> 4 <sup>1</sup> 3 <sup>2</sup> 2 <sup>1</sup> | 6515.0814 | 5.22E-06 |                                                             |                                              |
| 6435.347  | 3.02E-06 |                                                                            | 3 <sup>2</sup> 1 <sup>1</sup>                               | 6516.4998 | 4.57E-06 |                                                             | 6 <sup>2</sup> 4 <sup>5</sup>                |
| 6436.712  | 5.16E-05 | 6 <sup>2</sup> 4 <sup>3</sup> 3 <sup>2</sup>                               |                                                             | 6518.0012 | 2.75E-06 |                                                             |                                              |
| 6438.224  | 7.64E-05 |                                                                            |                                                             | 6519.398  | 1.03E-05 |                                                             |                                              |
| 6442.145  | 6.21E-05 |                                                                            |                                                             | 6526.2078 | 3.73E-06 |                                                             |                                              |
| 6444.91   | 1.50E-03 | 6 <sup>2</sup> 5 <sup>3</sup> 1 <sup>1</sup>                               |                                                             | 6526.8756 | 2.03E-05 |                                                             |                                              |
| 6446.497  | 8.17E-05 | 6 <sup>2</sup> 5 <sup>5</sup> 3 <sup>2</sup>                               |                                                             | 6529.7472 | 4.32E-06 |                                                             |                                              |
| 6447.568  | 3.48E-05 |                                                                            |                                                             | 6533.8507 | 1.87E-05 |                                                             |                                              |
| 6452.265  | 2.90E-05 |                                                                            |                                                             | 6536.4702 | 4.92E-06 |                                                             |                                              |
| 6453.443  | 5.36E-05 |                                                                            |                                                             | 6540.1549 | 6.50E-07 |                                                             |                                              |
| 6455.457  | 9.99E-06 |                                                                            |                                                             | 6541.5491 | 4.28E-07 |                                                             |                                              |
| 6458.588  | 5.38E-05 |                                                                            | 5 <sup>2</sup> 4 <sup>1</sup> 3 <sup>3</sup>                | 6544.3159 | 5.28E-07 |                                                             |                                              |



| Energy    | Lifetime | <i>trans</i>                                    | <i>cis</i>                         | Energy   | Lifetime | <i>trans</i>                                    | <i>cis</i>                         |
|-----------|----------|-------------------------------------------------|------------------------------------|----------|----------|-------------------------------------------------|------------------------------------|
| 6546.554  | 1.70E-06 |                                                 |                                    | 6623.883 | 4.35E-05 |                                                 |                                    |
| 6548.2584 | 1.18E-06 |                                                 |                                    | 6625.844 | 5.72E-06 |                                                 | 6 <sup>25</sup> 14 <sup>23</sup> 2 |
| 6549.9165 | 1.04E-06 |                                                 |                                    | 6628.692 | 2.23E-06 |                                                 |                                    |
| 6551.1265 | 1.58E-07 |                                                 |                                    | 6630.348 | 1.19E-05 |                                                 |                                    |
| 6553.1185 | 2.61E-07 |                                                 |                                    | 6633.197 | 7.72E-06 | 5 <sup>73</sup> 2                               |                                    |
| 6557.9763 | 4.53E-07 | 6 <sup>45</sup> 2 <sup>33</sup>                 |                                    | 6633.482 | 2.05E-05 |                                                 |                                    |
| 6559.2338 | 3.19E-06 | 6 <sup>24</sup> 2 <sup>33</sup>                 |                                    | 6636.648 | 5.07E-06 |                                                 | 5 <sup>43</sup> 3                  |
| 6563.286  | 6.76E-07 |                                                 | 6 <sup>25</sup> 14 <sup>23</sup> 3 | 6639.04  | 5.99E-04 | 5 <sup>33</sup> 1 <sup>1</sup>                  |                                    |
| 6564.2147 | 2.49E-07 |                                                 |                                    | 6639.265 | 1.13E-05 | 6 <sup>25</sup> 4 <sup>4</sup> 2 <sup>3</sup> 1 |                                    |
| 6565.8796 | 1.74E-06 |                                                 |                                    | 6641.457 | 2.07E-06 |                                                 |                                    |
| 6566.4206 | 1.28E-04 |                                                 |                                    | 6643.209 | 6.70E-04 | 6 <sup>24</sup> 2 <sup>1</sup> 1                |                                    |
| 6569.2954 | 1.01E-05 | 6 <sup>25</sup> 4 <sup>4</sup> 2 <sup>3</sup> 1 |                                    | 6644.515 | 1.77E-05 | 6 <sup>65</sup> 2 <sup>4</sup> 1 <sup>2</sup> 1 |                                    |
| 6570.0095 | 2.97E-06 |                                                 |                                    | 6650.89  | 2.36E-06 | 6 <sup>25</sup> 2 <sup>4</sup> 2 <sup>3</sup> 2 |                                    |
| 6573.2605 | 8.88E-06 |                                                 |                                    | 6653.368 | 1.46E-06 | 5 <sup>24</sup> 3 <sup>3</sup> 2                |                                    |
| 6573.7396 | 7.85E-06 | 5 <sup>53</sup> 3                               |                                    | 6653.546 | 8.86E-07 |                                                 |                                    |
| 6573.9275 | 8.27E-06 |                                                 | 5 <sup>14</sup> 2 <sup>1</sup> 1   | 6657.666 | 4.94E-06 |                                                 |                                    |
| 6575.8243 | 1.48E-05 |                                                 |                                    | 6657.943 | 2.94E-06 |                                                 |                                    |
| 6576.0177 | 1.08E-06 |                                                 |                                    | 6661.006 | 1.00E-06 |                                                 |                                    |
| 6579.9063 | 7.34E-07 |                                                 |                                    | 6662.249 | 1.21E-06 |                                                 |                                    |
| 6582.0184 | 5.10E-07 |                                                 |                                    | 6671.288 | 1.83E-06 | 5 <sup>93</sup> 1                               |                                    |
| 6582.8611 | 3.02E-07 |                                                 | 6 <sup>25</sup> 14 <sup>23</sup> 2 | 6673.007 | 2.05E-07 |                                                 |                                    |
| 6586.7624 | 1.41E-05 |                                                 |                                    | 6677.832 | 1.46E-06 |                                                 |                                    |
| 6587.8449 | 1.19E-04 | 6 <sup>25</sup> 4 <sup>3</sup> 2 <sup>2</sup> 1 |                                    | 6679.346 | 5.53E-08 |                                                 |                                    |
| 6589.4859 | 4.98E-05 | 5 <sup>13</sup> 2 <sup>1</sup> 1                |                                    | 6680.188 | 3.20E-07 |                                                 |                                    |
| 6589.7456 | 1.28E-05 |                                                 |                                    | 6682.263 | 3.60E-08 | 6 <sup>65</sup> 14 <sup>13</sup> 2              |                                    |
| 6591.5233 | 2.94E-06 |                                                 |                                    | 6687.842 | 6.51E-07 |                                                 |                                    |
| 6592.8638 | 1.17E-05 |                                                 |                                    | 6688.943 | 1.33E-06 | 4 <sup>23</sup> 4                               |                                    |
| 6594.4713 | 1.12E-05 |                                                 |                                    | 6692.437 | 4.24E-07 |                                                 |                                    |
| 6599.5679 | 5.46E-07 | 6 <sup>25</sup> 2 <sup>4</sup> 2 <sup>3</sup> 2 |                                    | 6694.595 | 6.14E-07 |                                                 |                                    |
| 6600.2279 | 1.06E-07 |                                                 |                                    | 6695.897 | 8.16E-07 |                                                 |                                    |
| 6606.8279 | 1.59E-05 |                                                 |                                    | 6700.927 | 7.87E-06 |                                                 |                                    |
| 6607.5623 | 8.86E-06 |                                                 |                                    | 6701.755 | 7.48E-08 |                                                 |                                    |
| 6609.4394 | 4.34E-06 | 6 <sup>64</sup> 4                               |                                    | 6703.341 | 1.19E-06 |                                                 |                                    |
| 6611.7598 | 6.67E-07 |                                                 |                                    | 6703.778 | 6.71E-07 | 6 <sup>45</sup> 2 <sup>1</sup> 1                |                                    |
| 6612.7574 | 1.31E-06 |                                                 |                                    | 6705.246 | 3.88E-05 | 5 <sup>22</sup> 1 <sup>1</sup>                  |                                    |
| 6613.6631 | 1.38E-05 |                                                 |                                    | 6706.817 | 1.77E-07 |                                                 |                                    |
| 6614.0798 | 5.90E-06 |                                                 |                                    | 6707.061 | 1.37E-05 |                                                 |                                    |
| 6616.033  | 5.80E-06 |                                                 |                                    | 6709.316 | 1.97E-07 |                                                 |                                    |
| 6619.331  | 1.66E-05 |                                                 |                                    | 6710.816 | 8.06E-07 | 6 <sup>23</sup> 5                               |                                    |
| 6621.59   | 4.81E-06 |                                                 |                                    | 6713.113 | 8.88E-06 |                                                 |                                    |
| 6621.997  | 3.05E-05 |                                                 |                                    | 6714.89  | 3.81E-06 |                                                 |                                    |
| 6623.027  | 5.80E-05 | 6 <sup>24</sup> 1 <sup>3</sup> 4                |                                    | 6715.889 | 2.36E-06 |                                                 |                                    |

| Energy    | Lifetime | <i>trans</i>                       | <i>cis</i>                         | Energy    | Lifetime | <i>trans</i> | <i>cis</i> |
|-----------|----------|------------------------------------|------------------------------------|-----------|----------|--------------|------------|
| 6717.028  | 1.03E-06 |                                    |                                    | 6801.8107 | 6.18E-07 |              |            |
| 6719.513  | 1.29E-07 |                                    |                                    | 6803.374  | 2.30E-06 |              |            |
| 6722.092  | 6.21E-06 |                                    |                                    | 6804.2907 | 6.60E-07 |              |            |
| 6725.88   | 8.10E-05 |                                    |                                    | 6808.7925 | 3.99E-07 |              |            |
| 6728.5    | 7.09E-07 |                                    |                                    | 6810.033  | 5.58E-07 |              |            |
| 6730.154  | 3.45E-06 |                                    |                                    | 6811.4515 | 6.05E-07 |              |            |
| 6732.533  | 3.63E-07 |                                    |                                    | 6815.3992 | 1.66E-06 |              |            |
| 6737.04   | 9.39E-08 |                                    |                                    | 6816.2155 | 5.39E-06 |              |            |
| 6739.2592 | 1.52E-06 |                                    |                                    | 6816.533  | 5.54E-07 |              |            |
| 6741.3601 | 7.81E-07 |                                    |                                    | 6821.5549 | 9.51E-06 |              |            |
| 6742.9152 | 1.63E-06 |                                    |                                    | 6822.0007 | 1.87E-06 |              |            |
| 6743.6276 | 1.21E-06 |                                    |                                    | 6823.9745 | 4.58E-06 |              |            |
| 6746.1039 | 4.46E-07 |                                    |                                    | 6825.6818 | 4.40E-06 |              |            |
| 6748.4011 | 6.32E-08 |                                    | 6 <sup>05</sup> 14 <sup>33</sup> 2 | 6828.4929 | 1.91E-06 |              |            |
| 6749.5997 | 6.89E-07 |                                    | 6 <sup>03</sup> 5                  | 6829.1944 | 8.68E-07 |              |            |
| 6753.5672 | 3.33E-08 |                                    | 6 <sup>04</sup> 5 <sup>3</sup> 1   | 6830.9968 | 8.11E-06 |              |            |
| 6754.1842 | 5.95E-06 | 6 <sup>25</sup> 24 <sup>13</sup> 3 |                                    | 6833.7458 | 1.20E-06 |              |            |
| 6755.3615 | 9.26E-07 |                                    |                                    | 6835.9189 | 1.46E-05 |              |            |
| 6756.4621 | 1.51E-06 |                                    |                                    | 6839.0601 | 5.33E-06 |              |            |
| 6762.2126 | 6.98E-07 |                                    |                                    | 6839.9236 | 1.10E-06 |              |            |
| 6763.8457 | 2.79E-07 |                                    |                                    | 6840.533  | 4.59E-06 |              |            |
| 6764.6034 | 2.62E-06 |                                    |                                    | 6841.967  | 2.54E-05 |              |            |
| 6766.591  | 4.65E-07 |                                    |                                    | 6843.707  | 1.28E-05 |              |            |
| 6768.7202 | 3.03E-07 |                                    |                                    | 6843.99   | 1.22E-05 |              |            |
| 6769.4776 | 1.08E-07 |                                    |                                    | 6846.537  | 1.12E-05 |              |            |
| 6770.7407 | 3.47E-08 |                                    |                                    | 6848.102  | 8.22E-06 |              |            |
| 6772.3242 | 1.25E-05 |                                    |                                    | 6850.275  | 3.67E-05 |              |            |
| 6777.0281 | 9.78E-07 |                                    |                                    | 6853.408  | 1.77E-04 |              |            |
| 6777.233  | 1.81E-06 |                                    |                                    | 6859.279  | 3.49E-06 |              |            |
| 6780.0168 | 8.88E-08 |                                    |                                    | 6860.746  | 2.85E-06 |              |            |
| 6780.7031 | 7.67E-07 |                                    |                                    | 6861.93   | 1.98E-06 |              |            |
| 6782.2296 | 2.22E-06 |                                    |                                    | 6862.987  | 3.15E-04 |              |            |
| 6785.6046 | 9.22E-07 |                                    |                                    | 6863.851  | 1.52E-04 |              |            |
| 6786.0901 | 2.68E-06 |                                    |                                    | 6865.849  | 9.31E-06 |              |            |
| 6787.6655 | 4.57E-07 |                                    |                                    | 6867.648  | 1.95E-06 |              |            |
| 6790.2689 | 6.05E-07 |                                    |                                    | 6869.179  | 2.74E-06 |              |            |
| 6791.64   | 3.30E-07 |                                    |                                    | 6872.959  | 1.42E-06 |              |            |
| 6792.6556 | 1.90E-06 |                                    |                                    | 6876.772  | 1.20E-08 |              |            |
| 6796.5321 | 3.73E-06 |                                    |                                    | 6878.708  | 4.15E-07 |              |            |
| 6798.6644 | 1.18E-06 |                                    |                                    | 6880.854  | 8.76E-07 |              |            |
| 6799.6316 | 3.60E-07 |                                    |                                    | 6882.001  | 2.31E-06 |              |            |
| 6801.0135 | 6.56E-07 |                                    |                                    | 6883.086  | 6.00E-06 |              |            |

| Energy    | Lifetime | <i>trans</i>                                                | <i>cis</i>                                                  | Energy        | Lifetime | <i>trans</i>                                                               | <i>cis</i>                                   |
|-----------|----------|-------------------------------------------------------------|-------------------------------------------------------------|---------------|----------|----------------------------------------------------------------------------|----------------------------------------------|
| 6883.569  | 1.99E-06 |                                                             |                                                             | 6969.8708     | 2.18E-06 |                                                                            |                                              |
| 6885.877  | 5.86E-06 |                                                             |                                                             | 6971.4809     | 1.73E-07 |                                                                            |                                              |
| 6886.611  | 4.06E-06 |                                                             |                                                             | 6970.1576     | 1.16E-06 |                                                                            |                                              |
| 6888.071  | 1.25E-07 |                                                             |                                                             | 6973.1487     | 9.27E-07 |                                                                            |                                              |
| 6890.515  | 1.64E-06 |                                                             |                                                             | 6976.2101     | 3.52E-07 |                                                                            |                                              |
| 6891.08   | 2.03E-07 |                                                             |                                                             | 6976.7645     | 9.44E-07 |                                                                            |                                              |
| 6891.264  | 1.02E-06 |                                                             |                                                             | 6978.6414     | 9.29E-08 |                                                                            | 6 <sup>2</sup> 4 <sup>3</sup> 3 <sup>2</sup> |
| 6895.506  | 3.38E-08 |                                                             |                                                             | 6979.9749     | 1.53E-07 |                                                                            |                                              |
| 6897.318  | 7.18E-07 |                                                             |                                                             | 6983.3631     | 1.79E-07 | 5 <sup>4</sup> 4 <sup>1</sup> 3 <sup>2</sup>                               |                                              |
| 6899.681  | 3.60E-07 |                                                             |                                                             | 6985.1675     | 1.10E-06 |                                                                            |                                              |
| 6902.378  | 4.45E-08 |                                                             | 5 <sup>2</sup> 4 <sup>1</sup> 3 <sup>3</sup>                | 6985.5766     | 8.38E-08 |                                                                            |                                              |
| 6904.508  | 7.34E-08 |                                                             | 6 <sup>2</sup> 4 <sup>4</sup> 3 <sup>1</sup>                | 6987.7043     | 5.05E-07 |                                                                            |                                              |
| 6908.792  | 2.04E-07 |                                                             | 6 <sup>4</sup> 5 <sup>2</sup> 4 <sup>2</sup> 3 <sup>1</sup> | 6989.6272     | 8.01E-05 | 6 <sup>2</sup> 4 <sup>6</sup>                                              |                                              |
| 6911.965  | 1.08E-06 |                                                             |                                                             | 6991.0131     | 7.77E-08 |                                                                            |                                              |
| 6915.577  | 8.44E-07 |                                                             |                                                             | 6995.0909     | 1.36E-07 |                                                                            |                                              |
| 6919.896  | 1.05E-07 |                                                             |                                                             | 6997.6523     | 1.61E-06 |                                                                            |                                              |
| 6921.648  | 2.26E-06 | 6 <sup>2</sup> 5 <sup>2</sup> 4 <sup>1</sup> 2 <sup>2</sup> |                                                             | 6999.069      | 1.77E-07 |                                                                            | 6 <sup>2</sup> 4 <sup>2</sup> 3 <sup>2</sup> |
| 6922.27   | 4.35E-08 |                                                             | 5 <sup>5</sup> 1 <sup>1</sup>                               | 7000.451<br>1 | 2.84E-05 | 6 <sup>2</sup> 5 <sup>3</sup> 3 <sup>2</sup> 2 <sup>1</sup>                |                                              |
| 6924.179  | 2.39E-07 |                                                             |                                                             | 7002.1084     | 1.94E-07 |                                                                            |                                              |
| 6924.73   | 5.69E-08 |                                                             | 5 <sup>2</sup> 4 <sup>4</sup> 3 <sup>1</sup>                | 7003.8151     | 1.01E-05 |                                                                            |                                              |
| 6927.469  | 1.65E-06 | 6 <sup>4</sup> 4 <sup>2</sup> 3 <sup>1</sup> 2 <sup>1</sup> |                                                             | 7007.9998     | 5.06E-07 |                                                                            |                                              |
| 6929.763  | 3.22E-06 |                                                             | 6 <sup>4</sup> 4 <sup>1</sup> 1 <sup>1</sup>                | 7009.011      | 1.36E-06 |                                                                            |                                              |
| 6932.203  | 1.38E-07 |                                                             |                                                             | 7010.4645     | 1.64E-07 |                                                                            |                                              |
| 6933.546  | 1.52E-07 |                                                             |                                                             | 7013.2987     | 5.63E-07 |                                                                            |                                              |
| 6934.302  | 3.19E-07 |                                                             |                                                             | 7014.6462     | 5.27E-07 | 6 <sup>4</sup> 5 <sup>5</sup> 4 <sup>1</sup> 3 <sup>1</sup>                |                                              |
| 6935.765  | 1.84E-06 |                                                             |                                                             | 7018.5985     | 9.44E-07 |                                                                            |                                              |
| 6938.464  | 7.58E-07 |                                                             |                                                             | 7020.0298     | 2.63E-06 |                                                                            |                                              |
| 6940.169  | 3.64E-08 |                                                             | 6 <sup>2</sup> 5 <sup>5</sup> 4 <sup>1</sup> 3 <sup>1</sup> | 7021.3174     | 6.58E-07 |                                                                            |                                              |
| 6941.172  | 2.68E-08 |                                                             | 6 <sup>2</sup> 5 <sup>7</sup> 3 <sup>1</sup>                | 7023.0057     | 4.93E-07 |                                                                            |                                              |
| 6943.932  | 1.79E-06 |                                                             | 6 <sup>2</sup> 4 <sup>4</sup> 3 <sup>1</sup>                | 7024.829      | 1.12E-07 |                                                                            | 6 <sup>2</sup> 4 <sup>2</sup> 1 <sup>1</sup> |
| 6944.96   | 1.13E-05 |                                                             |                                                             | 7026.1654     | 1.92E-06 |                                                                            |                                              |
| 6946.794  | 1.15E-07 |                                                             |                                                             | 7027.9158     | 8.08E-07 |                                                                            |                                              |
| 6947.7769 | 3.24E-06 |                                                             |                                                             | 7029.6083     | 2.50E-07 |                                                                            |                                              |
| 6951.1619 | 1.01E-07 |                                                             |                                                             | 7032.2979     | 1.45E-06 |                                                                            |                                              |
| 6953.2037 | 1.51E-06 |                                                             |                                                             | 7036.7218     | 4.62E-07 |                                                                            |                                              |
| 6955.3871 | 6.62E-07 |                                                             |                                                             | 7038.8346     | 9.29E-07 |                                                                            | 6 <sup>0</sup> 4 <sup>3</sup> 1 <sup>1</sup> |
| 6957.6916 | 1.41E-06 |                                                             |                                                             | 7039.1641     | 1.90E-06 |                                                                            |                                              |
| 6959.2472 | 1.73E-05 |                                                             |                                                             | 7042.0866     | 3.24E-07 |                                                                            |                                              |
| 6961.731  | 1.37E-06 |                                                             |                                                             | 7043.9652     | 6.82E-08 |                                                                            |                                              |
| 6962.5545 | 2.34E-06 |                                                             |                                                             | 7045.8123     | 2.49E-06 |                                                                            |                                              |
| 6964.4746 | 9.06E-07 |                                                             |                                                             | 7047.7435     | 2.07E-07 | 6 <sup>4</sup> 5 <sup>2</sup> 4 <sup>1</sup> 3 <sup>1</sup> 2 <sup>1</sup> |                                              |

| 6967.8408 | 1.52E-06 |                                                             |                                              | 7048.758  | 2.75E-07 |                                                             |                                                             |
|-----------|----------|-------------------------------------------------------------|----------------------------------------------|-----------|----------|-------------------------------------------------------------|-------------------------------------------------------------|
| Energy    | Lifetime | <i>trans</i>                                                | <i>cis</i>                                   | Energy    | Lifetime | <i>trans</i>                                                | <i>cis</i>                                                  |
| 7050.9973 | 1.13E-07 |                                                             | 6 <sup>2</sup> 4 <sup>2</sup> 1 <sup>1</sup> | 7136.402  | 1.93E-07 |                                                             |                                                             |
| 7052.5111 | 2.12E-07 |                                                             |                                              | 7137.31   | 4.02E-08 |                                                             |                                                             |
| 7054.752  | 5.10E-08 |                                                             |                                              | 7138.894  | 1.71E-07 |                                                             |                                                             |
| 7057.096  | 9.37E-08 |                                                             |                                              | 7140.999  | 7.37E-07 |                                                             |                                                             |
| 7059.437  | 8.44E-08 |                                                             |                                              | 7143.173  | 1.25E-08 |                                                             |                                                             |
| 7060.767  | 3.17E-07 |                                                             |                                              | 7146.37   | 4.41E-07 |                                                             |                                                             |
| 7061.821  | 3.11E-07 |                                                             |                                              | 7148.962  | 5.89E-07 |                                                             |                                                             |
| 7064.787  | 4.64E-08 |                                                             |                                              | 7150.137  | 1.12E-06 |                                                             |                                                             |
| 7065.412  | 2.09E-07 |                                                             |                                              | 7153.615  | 1.99E-07 |                                                             |                                                             |
| 7070.323  | 1.54E-07 |                                                             |                                              | 7155.611  | 1.55E-07 | 6 <sup>2</sup> 4 <sup>2</sup> 3 <sup>2</sup> 2 <sup>1</sup> |                                                             |
| 7073.311  | 1.37E-08 |                                                             | 5 <sup>2</sup> 4 <sup>4</sup> 3 <sup>1</sup> | 7156.425  | 6.22E-08 |                                                             |                                                             |
| 7074.122  | 1.45E-07 |                                                             |                                              | 7158.244  | 1.19E-07 |                                                             | 6 <sup>4</sup> 5 <sup>2</sup> 4 <sup>1</sup> 3 <sup>2</sup> |
| 7074.854  | 3.42E-07 |                                                             |                                              | 7161.613  | 8.84E-09 |                                                             |                                                             |
| 7079.546  | 4.74E-08 |                                                             |                                              | 7161.2669 | 5.31E-07 |                                                             |                                                             |
| 7081.443  | 4.21E-07 |                                                             |                                              | 7164.7215 | 1.32E-07 |                                                             |                                                             |
| 7082.269  | 6.58E-07 |                                                             |                                              | 7166.6059 | 1.34E-06 |                                                             |                                                             |
| 7085.464  | 1.93E-07 |                                                             |                                              | 7170.6188 | 2.09E-08 |                                                             |                                                             |
| 7089.12   | 3.14E-07 |                                                             |                                              | 7172.4028 | 1.48E-08 |                                                             |                                                             |
| 7090.053  | 4.69E-07 |                                                             |                                              | 7174.4268 | 3.38E-07 |                                                             |                                                             |
| 7091.997  | 6.31E-07 | 6 <sup>2</sup> 5 <sup>1</sup> 4 <sup>2</sup> 3 <sup>3</sup> |                                              | 7176.2061 | 1.50E-08 |                                                             |                                                             |
| 7094.177  | 9.93E-07 |                                                             |                                              | 7178.1717 | 6.53E-08 |                                                             |                                                             |
| 7095.062  | 4.89E-07 |                                                             |                                              | 7182.5514 | 3.73E-07 |                                                             |                                                             |
| 7096.983  | 5.51E-08 |                                                             |                                              | 7184.0826 | 8.42E-08 |                                                             |                                                             |
| 7098.312  | 8.89E-07 |                                                             |                                              | 7188.0578 | 1.03E-06 | 6 <sup>2</sup> 5 <sup>1</sup> 4 <sup>2</sup> 1 <sup>1</sup> |                                                             |
| 7099.755  | 2.21E-05 |                                                             |                                              | 7188.6407 | 4.29E-07 |                                                             | 1 <sup>2</sup>                                              |
| 7101.365  | 4.07E-07 |                                                             | 6 <sup>4</sup> 5 <sup>2</sup> 1 <sup>1</sup> | 7189.977  | 2.93E-07 | 6 <sup>0</sup> 5 <sup>2</sup> 3 <sup>2</sup> 1 <sup>1</sup> |                                                             |
| 7102.002  | 3.79E-07 |                                                             |                                              | 7192.0589 | 5.12E-07 |                                                             |                                                             |
| 7104.555  | 2.85E-05 | 1 <sup>2</sup>                                              |                                              | 7196.5171 | 1.92E-06 |                                                             |                                                             |
| 7108.82   | 4.63E-06 | 6 <sup>4</sup> 5 <sup>1</sup> 4 <sup>1</sup> 2 <sup>2</sup> |                                              | 7197.9157 | 2.86E-07 | 6 <sup>4</sup> 5 <sup>2</sup> 4 <sup>1</sup> 3 <sup>2</sup> |                                                             |
| 7110.175  | 5.61E-07 |                                                             |                                              | 7200.8343 | 2.24E-07 | 6 <sup>2</sup> 4 <sup>6</sup>                               |                                                             |
| 7112.565  | 4.55E-07 |                                                             |                                              | 7200.3076 | 3.19E-07 |                                                             |                                                             |
| 7114.667  | 1.55E-07 |                                                             |                                              | 7203.1146 | 1.16E-07 |                                                             |                                                             |
| 7117.254  | 4.69E-07 |                                                             |                                              | 7204.8682 | 7.03E-07 |                                                             |                                                             |
| 7119.594  | 4.53E-07 |                                                             |                                              | 7206.1686 | 3.21E-07 |                                                             |                                                             |
| 7120.796  | 7.03E-08 |                                                             |                                              | 7208.7867 | 1.01E-06 |                                                             |                                                             |
| 7122.954  | 5.53E-07 | 6 <sup>4</sup> 5 <sup>1</sup> 4 <sup>1</sup> 1 <sup>1</sup> |                                              | 7210.9326 | 4.05E-07 |                                                             |                                                             |
| 7125.016  | 1.50E-07 |                                                             |                                              | 7214.445  | 1.35E-06 | 6 <sup>6</sup> 3 <sup>4</sup>                               |                                                             |
| 7125.995  | 1.12E-07 |                                                             |                                              | 7215.5368 | 5.23E-07 |                                                             | 6 <sup>4</sup> 5 <sup>2</sup> 4 <sup>1</sup> 3 <sup>2</sup> |
| 7129.391  | 2.14E-07 | 5 <sup>4</sup> 4 <sup>1</sup> 1 <sup>1</sup>                |                                              | 7217.6758 | 1.79E-06 |                                                             | 6 <sup>4</sup> 3 <sup>1</sup> 1 <sup>1</sup>                |
| 7130.243  | 4.13E-08 |                                                             |                                              | 7224.4708 | 2.11E-07 |                                                             |                                                             |
| 7132.75   | 1.02E-07 |                                                             |                                              | 7221.3979 | 3.68E-08 |                                                             |                                                             |

|           |          |                                   |                                  |           |          |                                                 |                                                 |
|-----------|----------|-----------------------------------|----------------------------------|-----------|----------|-------------------------------------------------|-------------------------------------------------|
| 7134.134  | 5.39E-08 |                                   |                                  | 7222.3162 | 2.74E-07 | 6 <sup>25</sup> 1 <sup>4</sup> 3 <sup>4</sup>   |                                                 |
| Energy    | Lifetime | <i>trans</i>                      | <i>cis</i>                       | Energy    | Lifetime | <i>trans</i>                                    | <i>cis</i>                                      |
| 7226.8587 | 3.64E-08 |                                   |                                  | 7316.331  | 1.66E-06 |                                                 |                                                 |
| 7228.8411 | 1.28E-07 |                                   |                                  | 7318.399  | 3.65E-07 |                                                 |                                                 |
| 7231.5488 | 1.31E-08 |                                   |                                  | 7321.857  | 5.75E-08 |                                                 |                                                 |
| 7233.0382 | 4.37E-07 |                                   |                                  | 7323.61   | 3.36E-08 |                                                 |                                                 |
| 7234.046  | 3.78E-06 | 6 <sup>45</sup> 3 <sup>1</sup> 1  |                                  | 7325.463  | 1.18E-08 |                                                 |                                                 |
| 7236.2967 | 1.13E-07 |                                   |                                  | 7327.596  | 2.07E-08 |                                                 |                                                 |
| 7237.3478 | 4.04E-07 | 6 <sup>64</sup> 1 <sup>1</sup> 1  |                                  | 7329.767  | 1.35E-07 | 6 <sup>01</sup> 2 <sup>2</sup>                  |                                                 |
| 7239.4353 | 3.57E-07 | 6 <sup>45</sup> 3 <sup>1</sup> 11 |                                  | 7332.697  | 2.91E-08 |                                                 |                                                 |
| 7240.5507 | 4.05E-07 |                                   |                                  | 7334.691  | 1.12E-07 |                                                 |                                                 |
| 7247.3279 | 5.33E-07 |                                   |                                  | 7337.058  | 1.56E-06 |                                                 |                                                 |
| 7250.0868 | 2.22E-07 |                                   |                                  | 7338.682  | 4.03E-09 |                                                 |                                                 |
| 7251.9728 | 3.20E-07 |                                   |                                  | 7342.674  | 8.64E-09 |                                                 |                                                 |
| 7253.9759 | 7.77E-08 |                                   |                                  | 7341.931  | 3.70E-08 |                                                 |                                                 |
| 7257.1965 | 2.50E-08 |                                   |                                  | 7345.751  | 1.93E-08 |                                                 |                                                 |
| 7259.54   | 4.93E-07 |                                   |                                  | 7346.803  | 2.38E-08 |                                                 |                                                 |
| 7260.6216 | 2.81E-08 |                                   |                                  | 7348.879  | 8.22E-07 |                                                 |                                                 |
| 7262.0892 | 3.65E-07 |                                   |                                  | 7353.818  | 2.37E-08 |                                                 |                                                 |
| 7263.6432 | 1.11E-06 |                                   |                                  | 7355.061  | 3.80E-08 |                                                 |                                                 |
| 7266.2941 | 1.42E-07 | 6 <sup>44</sup> 3 <sup>3</sup> 2  |                                  | 7357.053  | 3.30E-08 | 6 <sup>45</sup> 3 <sup>2</sup> 2                |                                                 |
| 7268.8686 | 5.99E-07 |                                   |                                  | 7358.062  | 2.84E-07 |                                                 |                                                 |
| 7271.3832 | 1.59E-07 |                                   |                                  | 7359.014  | 8.86E-09 | 6 <sup>24</sup> 2 <sup>2</sup> 1 <sup>1</sup> 1 |                                                 |
| 7271.9508 | 6.52E-07 |                                   |                                  | 7361.499  | 1.31E-07 |                                                 |                                                 |
| 7274.8851 | 3.23E-07 |                                   |                                  | 7364.094  | 2.85E-07 |                                                 |                                                 |
| 7275.862  | 9.07E-09 |                                   |                                  | 7367.249  | 4.16E-07 |                                                 |                                                 |
| 7278.5063 | 3.23E-09 |                                   |                                  | 7368.039  | 4.72E-07 |                                                 |                                                 |
| 7279.011  | 4.99E-08 |                                   |                                  | 7370.612  | 1.08E-07 |                                                 |                                                 |
| 7281.758  | 3.79E-08 |                                   |                                  | 7372.2    | 2.95E-07 | 6 <sup>65</sup> 4 <sup>3</sup> 2                |                                                 |
| 7283.479  | 1.45E-06 |                                   | 6 <sup>44</sup> 1 <sup>3</sup> 3 | 7374.359  | 4.99E-08 |                                                 |                                                 |
| 7285.508  | 6.45E-07 |                                   |                                  | 7377.733  | 1.68E-08 |                                                 |                                                 |
| 7288.564  | 6.85E-08 |                                   |                                  | 7379.866  | 3.69E-07 | 6 <sup>25</sup> 1 <sup>4</sup> 2 <sup>2</sup> 2 |                                                 |
| 7289.739  | 6.94E-08 |                                   |                                  | 7381.933  | 7.91E-08 |                                                 |                                                 |
| 7291.501  | 3.46E-07 |                                   |                                  | 7384.949  | 3.29E-08 |                                                 | 6 <sup>25</sup> 2 <sup>3</sup> 1 <sup>1</sup> 1 |
| 7292.898  | 5.85E-07 |                                   |                                  | 7389.875  | 2.01E-07 | 6 <sup>05</sup> 1 <sup>4</sup> 3 <sup>5</sup>   |                                                 |
| 7295.632  | 2.35E-06 |                                   |                                  | 7391.246  | 1.99E-07 |                                                 |                                                 |
| 7297.186  | 3.46E-07 |                                   |                                  | 7392.748  | 3.15E-07 |                                                 |                                                 |
| 7299.545  | 3.28E-07 |                                   |                                  | 7395.506  | 7.56E-07 |                                                 |                                                 |
| 7302.02   | 6.47E-07 |                                   |                                  | 7397.676  | 1.88E-07 |                                                 |                                                 |
| 7302.968  | 6.07E-07 |                                   |                                  | 7399.8358 | 2.45E-07 |                                                 |                                                 |
| 7308.038  | 1.41E-07 |                                   |                                  | 7400.6274 | 1.76E-07 |                                                 |                                                 |
| 7310.93   | 6.73E-08 |                                   |                                  | 7403.4219 | 1.25E-06 |                                                 |                                                 |
| 7312.63   | 8.47E-08 |                                   |                                  | 7405.5142 | 4.29E-08 |                                                 |                                                 |

|           |          |                                                                            |                                                             |           |          |                                                             |            |
|-----------|----------|----------------------------------------------------------------------------|-------------------------------------------------------------|-----------|----------|-------------------------------------------------------------|------------|
| 7315.155  | 1.38E-07 | 6 <sup>4</sup> 5 <sup>1</sup> 4 <sup>2</sup> 2 <sup>1</sup>                |                                                             | 7405.5142 | 4.29E-08 |                                                             |            |
| Energy    | Lifetime | <i>trans</i>                                                               | <i>cis</i>                                                  | Energy    | Lifetime | <i>trans</i>                                                | <i>cis</i> |
| 7406.7231 | 3.56E-07 |                                                                            |                                                             | 7494.8487 | 7.63E-09 |                                                             |            |
| 7409.1043 | 7.24E-09 |                                                                            |                                                             | 7497.499  | 2.55E-08 | 6 <sup>6</sup> 4 <sup>3</sup> 2 <sup>1</sup>                |            |
| 7411.2942 | 1.98E-08 |                                                                            |                                                             | 7499.0074 | 3.38E-08 | 6 <sup>6</sup> 5 <sup>2</sup> 2 <sup>2</sup>                |            |
| 7413.2624 | 8.39E-08 |                                                                            |                                                             | 7500.9181 | 8.67E-08 | 6 <sup>0</sup> 4 <sup>2</sup> 2 <sup>1</sup> 1 <sup>1</sup> |            |
| 7416.1675 | 2.10E-07 |                                                                            |                                                             | 7506.0263 | 8.73E-09 |                                                             |            |
| 7417.4025 | 1.41E-08 |                                                                            |                                                             | 7506.5352 | 6.24E-09 |                                                             |            |
| 7420.079  | 3.73E-07 |                                                                            |                                                             | 7510.8661 | 5.76E-09 |                                                             |            |
| 7421.5531 | 4.61E-08 |                                                                            |                                                             | 7512.228  | 2.75E-08 |                                                             |            |
| 7423.4806 | 2.27E-08 |                                                                            |                                                             | 7514.601  | 2.92E-08 |                                                             |            |
| 7426.6897 | 4.24E-07 |                                                                            |                                                             | 7515.306  | 2.66E-08 |                                                             |            |
| 7429.1991 | 1.47E-06 |                                                                            |                                                             | 7518.467  | 3.02E-08 |                                                             |            |
| 7431.0164 | 1.64E-08 |                                                                            |                                                             | 7519.446  | 3.32E-08 |                                                             |            |
| 7432.3106 | 5.87E-08 |                                                                            |                                                             | 7521.489  | 1.35E-08 |                                                             |            |
| 7433.6911 | 1.62E-06 |                                                                            |                                                             | 7524.093  | 3.06E-09 |                                                             |            |
| 7437.2935 | 4.53E-08 |                                                                            |                                                             | 7525.727  | 3.18E-08 |                                                             |            |
| 7438.6174 | 1.72E-07 |                                                                            |                                                             | 7528.742  | 6.85E-09 |                                                             |            |
| 7441.1703 | 8.37E-07 |                                                                            |                                                             | 7530.385  | 4.17E-08 |                                                             |            |
| 7441.9723 | 6.85E-09 |                                                                            |                                                             | 7532.678  | 6.16E-08 |                                                             |            |
| 7443.7612 | 3.05E-09 | 6 <sup>6</sup> 5 <sup>2</sup> 1 <sup>1</sup>                               |                                                             | 7533.467  | 6.87E-08 |                                                             |            |
| 7446.993  | 4.39E-07 |                                                                            |                                                             | 7535.088  | 9.04E-08 |                                                             |            |
| 7449.0113 | 6.29E-08 |                                                                            |                                                             | 7536.626  | 3.43E-07 |                                                             |            |
| 7452.2215 | 1.37E-05 |                                                                            | 6 <sup>2</sup> 5 <sup>4</sup> 4 <sup>1</sup> 3 <sup>2</sup> | 7539.698  | 2.43E-08 |                                                             |            |
| 7453.6654 | 2.88E-07 |                                                                            |                                                             | 7540.669  | 7.22E-08 |                                                             |            |
| 7455.4168 | 2.61E-07 |                                                                            |                                                             | 7544.341  | 5.76E-08 |                                                             |            |
| 7457.6325 | 1.18E-07 |                                                                            |                                                             | 7545.508  | 5.38E-07 |                                                             |            |
| 7458.697  | 2.79E-07 |                                                                            |                                                             | 7548.894  | 1.43E-07 |                                                             |            |
| 7460.9323 | 1.41E-07 |                                                                            |                                                             | 7550.462  | 5.76E-07 |                                                             |            |
| 7464.4351 | 1.39E-07 | 6 <sup>0</sup> 5 <sup>1</sup> 3 <sup>6</sup>                               |                                                             | 7552.205  | 9.90E-08 |                                                             |            |
| 7466.3394 | 1.26E-07 |                                                                            |                                                             | 7554.632  | 1.32E-07 |                                                             |            |
| 7469.4824 | 3.32E-07 | 6 <sup>4</sup> 4 <sup>2</sup> 1 <sup>1</sup>                               |                                                             | 7556.992  | 1.41E-07 |                                                             |            |
| 7471.7669 | 2.07E-07 | 6 <sup>2</sup> 5 <sup>2</sup> 3 <sup>1</sup> 1 <sup>1</sup>                |                                                             | 7558.407  | 9.47E-08 |                                                             |            |
| 7472.6568 | 1.17E-07 |                                                                            |                                                             | 7560.912  | 5.53E-08 |                                                             |            |
| 7473.8681 | 9.76E-08 |                                                                            |                                                             | 7562.312  | 2.06E-08 |                                                             |            |
| 7476.6507 | 2.13E-06 |                                                                            |                                                             | 7566.251  | 1.74E-07 |                                                             |            |
| 7477.8245 | 6.65E-07 |                                                                            |                                                             | 7568.34   | 5.90E-08 |                                                             |            |
| 7480.3205 | 3.14E-07 | 6 <sup>2</sup> 4 <sup>1</sup> 2 <sup>1</sup> 1 <sup>1</sup>                |                                                             | 7570.38   | 5.28E-07 |                                                             |            |
| 7481.9387 | 3.56E-07 |                                                                            | 6 <sup>4</sup> 5 <sup>1</sup> 4 <sup>1</sup> 1 <sup>1</sup> | 7572.53   | 7.74E-08 |                                                             |            |
| 7485.7037 | 5.70E-09 |                                                                            |                                                             | 7575.808  | 5.44E-08 |                                                             |            |
| 7487.3569 | 2.42E-08 |                                                                            |                                                             | 7577.797  | 1.32E-09 |                                                             |            |
| 7487.7125 | 5.24E-08 | 6 <sup>2</sup> 5 <sup>1</sup> 4 <sup>1</sup> 3 <sup>1</sup> 1 <sup>1</sup> |                                                             | 7579.356  | 2.31E-08 |                                                             |            |
| 7490.9309 | 1.90E-06 |                                                                            |                                                             | 7581.571  | 7.66E-08 |                                                             |            |

|           |          |                                                              |                                               |           |          |                                               |            |
|-----------|----------|--------------------------------------------------------------|-----------------------------------------------|-----------|----------|-----------------------------------------------|------------|
| 7492.9967 | 2.84E-08 |                                                              |                                               | 7585.881  | 1.87E-07 |                                               |            |
| Energy    | Lifetime | <i>trans</i>                                                 | <i>cis</i>                                    | Energy    | Lifetime | <i>trans</i>                                  | <i>cis</i> |
| 7587.971  | 1.29E-06 |                                                              |                                               | 7678.5691 | 6.67E-08 |                                               |            |
| 7591.037  | 1.06E-07 |                                                              |                                               | 7682.1152 | 3.54E-08 |                                               |            |
| 7592.46   | 4.41E-07 |                                                              |                                               | 7682.8995 | 1.18E-07 |                                               |            |
| 7595.466  | 8.96E-08 |                                                              |                                               | 7685.1153 | 1.24E-08 |                                               |            |
| 7595.863  | 1.92E-08 |                                                              |                                               | 7686.8623 | 3.57E-08 |                                               |            |
| 7598.747  | 3.84E-09 |                                                              |                                               | 7689.0903 | 2.75E-07 | 6 <sup>45</sup> 2 <sup>4</sup> 1 <sup>1</sup> |            |
| 7600.968  | 2.12E-08 |                                                              |                                               | 7690.9925 | 6.70E-08 |                                               |            |
| 7602.02   | 3.85E-08 |                                                              |                                               | 7692.691  | 2.14E-08 |                                               |            |
| 7605.589  | 4.09E-07 |                                                              |                                               | 7695.5277 | 2.64E-07 |                                               |            |
| 7606.998  | 1.28E-07 |                                                              |                                               | 7696.8934 | 3.89E-09 |                                               |            |
| 7608.088  | 1.40E-08 |                                                              |                                               | 7697.9104 | 1.99E-07 |                                               |            |
| 7611.079  | 2.48E-07 |                                                              |                                               | 7702.0283 | 6.94E-09 | 6 <sup>05</sup> 5 <sup>3</sup> 4              |            |
| 7611.775  | 1.04E-07 |                                                              |                                               | 7706.6696 | 3.66E-07 |                                               |            |
| 7614.144  | 5.03E-07 |                                                              |                                               | 7707.613  | 6.25E-08 |                                               |            |
| 7616.616  | 2.75E-08 |                                                              |                                               | 7709.1092 | 1.82E-07 |                                               |            |
| 7618.829  | 6.70E-09 |                                                              |                                               | 7711.6969 | 1.51E-08 |                                               |            |
| 7622.535  | 2.74E-08 |                                                              |                                               | 7714.6971 | 1.96E-07 |                                               |            |
| 7623.549  | 2.09E-09 |                                                              |                                               | 7716.2167 | 4.80E-08 |                                               |            |
| 7625.652  | 2.03E-08 |                                                              |                                               | 7718.9624 | 1.10E-08 |                                               |            |
| 7629.0157 | 3.98E-08 |                                                              |                                               | 7719.902  | 1.62E-08 |                                               |            |
| 7630.4593 | 3.21E-07 |                                                              |                                               | 7721.9237 | 5.82E-07 |                                               |            |
| 7631.2704 | 1.74E-08 | 6 <sup>44</sup> 1 <sup>3</sup> 1 <sup>1</sup>                |                                               | 7723.4958 | 2.11E-08 |                                               |            |
| 7632.9238 | 8.85E-08 |                                                              |                                               | 7725.191  | 2.77E-07 |                                               |            |
| 7635.4452 | 2.89E-07 |                                                              |                                               | 7728.6346 | 4.94E-08 |                                               |            |
| 7637.2557 | 1.59E-08 |                                                              |                                               | 7731.7833 | 2.70E-07 |                                               |            |
| 7639.0509 | 1.59E-08 |                                                              |                                               | 7733.4009 | 8.93E-08 |                                               |            |
| 7641.9411 | 7.24E-08 |                                                              |                                               | 7735.4921 | 1.28E-08 |                                               |            |
| 7644.2084 | 1.31E-08 |                                                              |                                               | 7737.3203 | 3.14E-07 |                                               |            |
| 7646.0354 | 6.03E-09 |                                                              |                                               | 7739.9859 | 6.10E-09 |                                               |            |
| 7647.9962 | 6.72E-09 |                                                              |                                               | 7741.6069 | 3.64E-08 |                                               |            |
| 7651.7288 | 4.15E-07 |                                                              |                                               | 7742.4088 | 7.33E-09 |                                               |            |
| 7652.5408 | 1.95E-09 |                                                              |                                               | 7746.641  | 1.49E-08 |                                               |            |
| 7654.4114 | 1.56E-08 |                                                              |                                               | 7749.253  | 1.93E-09 |                                               |            |
| 7656.2881 | 1.68E-07 |                                                              |                                               | 7750.957  | 3.66E-08 |                                               |            |
| 7658.5171 | 2.49E-07 | 6 <sup>23</sup> 1 <sup>2</sup> 1 <sup>1</sup>                |                                               | 7752.393  | 5.14E-09 |                                               |            |
| 7661.506  | 2.07E-07 |                                                              |                                               | 7755.122  | 1.35E-08 |                                               |            |
| 7665.3089 | 4.21E-08 |                                                              |                                               | 7757.738  | 1.24E-08 |                                               |            |
| 7668.5756 | 7.69E-08 |                                                              |                                               | 7759.792  | 9.33E-09 | 6 <sup>23</sup> 6                             |            |
| 7671.6244 | 1.77E-08 |                                                              | 6 <sup>24</sup> 2 <sup>5</sup> 1 <sup>1</sup> | 7761.548  | 8.38E-09 |                                               |            |
| 7672.6739 | 5.17E-08 | 6 <sup>25</sup> 1 <sup>4</sup> 2 <sup>1</sup> 1 <sup>1</sup> |                                               | 7763.017  | 1.37E-09 |                                               |            |
| 7674.7542 | 2.30E-08 |                                                              |                                               | 7764.395  | 2.59E-08 |                                               |            |

|           |          |                                                             |                                              |           |          |                                                             |                                                             |
|-----------|----------|-------------------------------------------------------------|----------------------------------------------|-----------|----------|-------------------------------------------------------------|-------------------------------------------------------------|
| 7677.6909 | 6.69E-08 |                                                             |                                              | 7766.557  | 5.65E-08 |                                                             |                                                             |
| Energy    | Lifetime | <i>trans</i>                                                | <i>cis</i>                                   | Energy    | Lifetime | <i>trans</i>                                                | <i>cis</i>                                                  |
| 7768.696  | 6.60E-08 | 6 <sup>4</sup> 5 <sup>2</sup> 4 <sup>1</sup> 1 <sup>1</sup> |                                              | 7863.865  | 2.58E-08 |                                                             |                                                             |
| 7770.915  | 2.20E-08 |                                                             |                                              | 7865.4597 | 8.02E-08 |                                                             |                                                             |
| 7771.76   | 3.28E-08 |                                                             |                                              | 7868.954  | 1.65E-08 |                                                             |                                                             |
| 7775.051  | 1.49E-08 |                                                             |                                              | 7870.4944 | 1.55E-08 |                                                             |                                                             |
| 7777.018  | 4.58E-09 |                                                             |                                              | 7872.5096 | 1.46E-08 |                                                             |                                                             |
| 7778.514  | 1.10E-08 |                                                             |                                              | 7875.2897 | 1.72E-08 |                                                             |                                                             |
| 7782.092  | 4.06E-08 |                                                             |                                              | 7877.3055 | 3.54E-08 |                                                             |                                                             |
| 7783.202  | 5.22E-08 | 6 <sup>0</sup> 5 <sup>7</sup> 3 <sup>3</sup>                |                                              | 7880.0145 | 2.96E-08 |                                                             |                                                             |
| 7790.215  | 3.61E-08 |                                                             |                                              | 7881.4145 | 1.06E-07 |                                                             |                                                             |
| 7790.781  | 2.89E-08 |                                                             |                                              | 7884.2565 | 4.14E-09 |                                                             |                                                             |
| 7792.816  | 3.73E-09 | 6 <sup>4</sup> 3 <sup>2</sup> 1 <sup>1</sup>                |                                              | 7885.5108 | 2.31E-08 |                                                             |                                                             |
| 7796.11   | 2.82E-08 |                                                             |                                              | 7887.685  | 2.02E-08 |                                                             |                                                             |
| 7797.043  | 1.53E-08 |                                                             |                                              | 7890.2036 | 3.32E-08 |                                                             |                                                             |
| 7798.465  | 2.58E-07 | 6 <sup>2</sup> 4 <sup>2</sup> 3 <sup>1</sup> 1 <sup>1</sup> |                                              | 7892.4267 | 1.10E-08 |                                                             |                                                             |
| 7802.947  | 7.82E-08 |                                                             |                                              | 7894.305  | 2.29E-08 |                                                             |                                                             |
| 7804.155  | 2.07E-07 |                                                             |                                              | 7896.1415 | 7.11E-08 |                                                             |                                                             |
| 7806.001  | 2.85E-08 |                                                             |                                              | 7897.5053 | 3.77E-09 |                                                             |                                                             |
| 7807.238  | 4.01E-07 |                                                             |                                              | 7899.6712 | 7.80E-09 |                                                             |                                                             |
| 7809.452  | 1.29E-08 |                                                             |                                              | 7902.7053 | 1.30E-08 |                                                             |                                                             |
| 7812.315  | 2.14E-08 |                                                             |                                              | 7905.2091 | 2.39E-08 |                                                             |                                                             |
| 7813.949  | 3.06E-08 |                                                             |                                              | 7905.8577 | 4.61E-08 |                                                             |                                                             |
| 7815.45   | 1.15E-08 |                                                             |                                              | 7909.5807 | 2.92E-09 |                                                             |                                                             |
| 7818.729  | 5.50E-09 |                                                             |                                              | 7913.8205 | 3.61E-08 |                                                             |                                                             |
| 7819.642  | 6.74E-09 |                                                             |                                              | 7914.4708 | 1.09E-09 |                                                             |                                                             |
| 7823.927  | 1.66E-08 |                                                             |                                              | 7916.156  | 8.41E-08 |                                                             |                                                             |
| 7828.887  | 1.68E-07 |                                                             |                                              | 7917.626  | 3.43E-08 |                                                             |                                                             |
| 7830.533  | 3.98E-08 |                                                             |                                              | 7920.3125 | 2.04E-09 |                                                             |                                                             |
| 7833.351  | 3.98E-08 |                                                             |                                              | 7922.0501 | 2.95E-08 |                                                             |                                                             |
| 7835.442  | 9.94E-09 | 6 <sup>2</sup> 4 <sup>7</sup>                               |                                              | 7924.1653 | 5.15E-10 |                                                             | 6 <sup>0</sup> 4 <sup>6</sup> 3 <sup>1</sup>                |
| 7837.859  | 3.54E-09 |                                                             |                                              | 7926.6631 | 4.89E-08 |                                                             |                                                             |
| 7839.773  | 6.85E-08 |                                                             |                                              | 7928.4226 | 1.14E-08 |                                                             |                                                             |
| 7841.241  | 4.35E-09 |                                                             |                                              | 7931.2447 | 7.60E-10 |                                                             | 6 <sup>2</sup> 5 <sup>5</sup> 4 <sup>1</sup> 3 <sup>2</sup> |
| 7842.352  | 5.80E-08 |                                                             |                                              | 7934.1241 | 1.64E-08 |                                                             |                                                             |
| 7845.664  | 1.76E-07 |                                                             |                                              | 7936.1875 | 1.48E-08 | 6 <sup>4</sup> 5 <sup>1</sup> 2 <sup>1</sup> 1 <sup>1</sup> |                                                             |
| 7848.141  | 1.39E-07 |                                                             |                                              | 7938.5427 | 2.87E-09 |                                                             | 3 <sup>6</sup>                                              |
| 7848.141  | 1.39E-07 |                                                             |                                              | 7941.2008 | 5.89E-09 |                                                             |                                                             |
| 7850.325  | 1.92E-09 |                                                             | 6 <sup>2</sup> 4 <sup>5</sup> 3 <sup>1</sup> | 7944.2618 | 9.14E-08 | 6 <sup>2</sup> 4 <sup>1</sup> 3 <sup>2</sup> 1 <sup>1</sup> |                                                             |
| 7853.448  | 1.33E-09 |                                                             |                                              | 7946.7949 | 2.12E-09 |                                                             | 6 <sup>2</sup> 5 <sup>3</sup> 3 <sup>1</sup>                |
| 7855.458  | 2.76E-09 |                                                             |                                              | 7950.4061 | 2.52E-09 | 6 <sup>4</sup> 5 <sup>4</sup> 1 <sup>1</sup>                |                                                             |
| 7857.083  | 7.92E-09 |                                                             |                                              | 7953.2568 | 7.61E-08 |                                                             |                                                             |
| 7858.359  | 1.03E-08 |                                                             |                                              | 7955.2323 | 5.32E-09 |                                                             |                                                             |



|           |          |              |            |           |          |              |            |
|-----------|----------|--------------|------------|-----------|----------|--------------|------------|
| 7859.842  | 9.66E-09 |              |            | 7957.4124 | 5.50E-08 |              |            |
| Energy    | Lifetime | <i>trans</i> | <i>cis</i> | Energy    | Lifetime | <i>trans</i> | <i>cis</i> |
| 7960.7984 | 9.54E-09 |              |            |           |          |              |            |
| 7962.9296 | 1.68E-08 |              |            |           |          |              |            |
| 7963.9461 | 1.51E-08 |              |            |           |          |              |            |
| 7965.4183 | 2.27E-08 |              |            |           |          |              |            |
| 7968.3717 | 5.72E-09 |              |            |           |          |              |            |
| 7969.9883 | 5.12E-08 |              |            |           |          |              |            |
| 7971.5926 | 8.44E-09 |              |            |           |          |              |            |
| 7975.4842 | 4.35E-08 |              |            |           |          |              |            |

**Table S2.** Energy and lifetimes of lifetime-convergent vibrational states of the HOCO system in the energy region of 6400-6500 cm<sup>-1</sup> (arranged by the lifetimes)

|           |          |                                                                            |                                                                            |           |          |                                                             |                                                             |
|-----------|----------|----------------------------------------------------------------------------|----------------------------------------------------------------------------|-----------|----------|-------------------------------------------------------------|-------------------------------------------------------------|
| 6492.8243 | 5.17E-08 |                                                                            | 6 <sup>0</sup> 5 <sup>5</sup> 4 <sup>3</sup>                               | 6494.2563 | 1.17E-05 |                                                             | 6 <sup>2</sup> 5 <sup>2</sup> 3 <sup>3</sup>                |
| 6494.9144 | 1.22E-07 | 6 <sup>2</sup> 5 <sup>4</sup> 4 <sup>2</sup> 3 <sup>1</sup>                |                                                                            | 6460.8052 | 1.57E-05 |                                                             |                                                             |
| 6491.5709 | 1.65E-07 | 6 <sup>0</sup> 5 <sup>3</sup> 3 <sup>4</sup>                               |                                                                            | 6490.2014 | 1.81E-05 |                                                             | 6 <sup>0</sup> 4 <sup>1</sup> 3 <sup>4</sup>                |
| 6418.1956 | 6.33E-07 |                                                                            | 6 <sup>2</sup> 5 <sup>4</sup> 3 <sup>2</sup>                               | 6462.2816 | 2.76E-05 |                                                             |                                                             |
| 6401.5953 | 1.12E-06 | 6 <sup>4</sup> 5 <sup>2</sup> 4 <sup>1</sup> 3 <sup>2</sup>                |                                                                            | 6400.4652 | 2.86E-05 |                                                             | 6 <sup>2</sup> 5 <sup>3</sup> 3 <sup>1</sup> 2 <sup>1</sup> |
| 6428.7518 | 1.47E-06 |                                                                            |                                                                            | 6452.2654 | 2.90E-05 |                                                             |                                                             |
| 6406.724  | 1.69E-06 |                                                                            |                                                                            | 6487.8783 | 2.98E-05 | 6 <sup>4</sup> 4 <sup>1</sup> 1 <sup>1</sup>                |                                                             |
| 6489.0144 | 2.06E-06 | 6 <sup>0</sup> 5 <sup>1</sup> 4 <sup>4</sup> 2 <sup>1</sup>                |                                                                            | 6430.2059 | 3.01E-05 |                                                             |                                                             |
| 6486.4502 | 2.17E-06 |                                                                            |                                                                            | 6447.5676 | 3.48E-05 |                                                             |                                                             |
| 6499.8004 | 2.28E-06 | 6 <sup>4</sup> 5 <sup>2</sup> 3 <sup>3</sup>                               |                                                                            | 6475.3611 | 4.48E-05 |                                                             |                                                             |
| 6404.962  | 2.35E-06 | 6 <sup>2</sup> 5 <sup>2</sup> 3 <sup>2</sup> 2 <sup>1</sup>                |                                                                            | 6436.7116 | 5.16E-05 | 6 <sup>2</sup> 4 <sup>3</sup> 3 <sup>2</sup>                |                                                             |
| 6435.347  | 3.02E-06 |                                                                            | 6 <sup>0</sup> 3 <sup>2</sup> 1 <sup>1</sup>                               | 6453.4427 | 5.36E-05 |                                                             |                                                             |
| 6423.1592 | 3.22E-06 |                                                                            | 6 <sup>0</sup> 5 <sup>2</sup> 4 <sup>1</sup> 3 <sup>3</sup>                | 6458.5875 | 5.38E-05 |                                                             | 6 <sup>2</sup> 5 <sup>2</sup> 3 <sup>3</sup>                |
| 6421.5551 | 3.36E-06 | 6 <sup>4</sup> 5 <sup>1</sup> 4 <sup>1</sup> 3 <sup>1</sup> 2 <sup>1</sup> |                                                                            | 6479.9842 | 5.39E-05 | 6 <sup>2</sup> 5 <sup>1</sup> 4 <sup>3</sup> 2 <sup>1</sup> |                                                             |
| 6409.4111 | 3.63E-06 |                                                                            |                                                                            | 6483.1242 | 5.66E-05 |                                                             |                                                             |
| 6428.474  | 4.04E-06 |                                                                            |                                                                            | 6442.1448 | 6.21E-05 |                                                             |                                                             |
| 6498.5101 | 4.11E-06 |                                                                            | 6 <sup>0</sup> 5 <sup>4</sup> 4 <sup>1</sup> 3 <sup>2</sup>                | 6438.2242 | 7.64E-05 | 6 <sup>2</sup> 2 <sup>1</sup> 1 <sup>1</sup>                |                                                             |
| 6469.9575 | 5.86E-06 |                                                                            |                                                                            | 6446.4966 | 8.17E-05 | 6 <sup>2</sup> 5 <sup>5</sup> 3 <sup>2</sup>                |                                                             |
| 6433.8493 | 6.02E-06 |                                                                            | 6 <sup>0</sup> 5 <sup>1</sup> 4 <sup>1</sup> 3 <sup>2</sup> 2 <sup>1</sup> | 6417.024  | 1.05E-04 | 6 <sup>4</sup> 3 <sup>4</sup>                               |                                                             |
| 6426.2033 | 6.56E-06 | 6 <sup>4</sup> 5 <sup>2</sup> 4 <sup>3</sup> 3 <sup>1</sup>                |                                                                            | 6415.5546 | 1.57E-04 | 6 <sup>2</sup> 5 <sup>1</sup> 4 <sup>3</sup> 2 <sup>1</sup> |                                                             |
| 6471.6938 | 6.99E-06 |                                                                            |                                                                            | 6423.7398 | 1.63E-04 |                                                             |                                                             |
| 6477.194  | 9.86E-06 | 6 <sup>6</sup> 4 <sup>2</sup> 2 <sup>1</sup>                               |                                                                            | 6482.2567 | 2.15E-04 | 6 <sup>0</sup> 5 <sup>3</sup> 4 <sup>1</sup> 1 <sup>1</sup> |                                                             |
| 6455.4565 | 9.99E-06 |                                                                            |                                                                            | 6467.8275 | 2.30E-04 |                                                             |                                                             |
| 6466.2144 | 1.07E-05 |                                                                            |                                                                            | 6444.9102 | 1.50E-03 | 6 <sup>2</sup> 5 <sup>3</sup> 1 <sup>1</sup>                |                                                             |
